1 **The reef-building coral *Galaxea fascicularis*: a new model system for coral**  
2 **symbiosis**

3 Giulia Puntin<sup>1</sup>, Jamie Craggs<sup>2,3</sup>, Róisín Hayden<sup>4</sup>, Kara E. Engelhardt<sup>1</sup>, Shelby McIlroy<sup>4</sup>, Michael  
4 Sweet<sup>3,5</sup>, David M. Baker<sup>4</sup>, Maren Ziegler<sup>1,\*</sup>

5 <sup>1</sup>Marine Holobiomics Lab, Department of Animal Ecology & Systematics, Justus Liebig  
6 University Giessen, Heinrich-Buff-Ring 26-32 IFZ, 35392 Giessen, Germany

7 <sup>2</sup>Horniman Museum and Gardens, Forest Hill, London, SE23 3PQ, United Kingdom.

8 <sup>3</sup>Coral Spawning Lab, Unit 6, Midas Metro Centre, 193 Garth Rd, Morden, SM4 4NE, United  
9 Kingdom

10 <sup>4</sup>The Swire Institute of Marine Science, University of Hong Kong, Cape D'Aguiar, Hong Kong

11 <sup>5</sup>Aquatic Research Facility, Environmental Sustainability Research Centre, University of Derby,  
12 DE22 1GB, United Kingdom

13 \*Corresponding author: [maren.ziegler@bio.uni-giessen.de](mailto:maren.ziegler@bio.uni-giessen.de)

14

15 **Abstract**

16 Reef-building corals owe their evolutionary success to their symbiosis with unicellular algae  
17 (Symbiodiniaceae). However, increasingly frequent heat waves lead to coral mass-bleaching  
18 events and pose a serious threat to the survival of reef ecosystems. Despite significant efforts, a  
19 mechanistic understanding of coral-algal symbiosis functioning, what leads to its breakdown and  
20 what can prevent it, remains incomplete. The main obstacles are low amenability of corals to  
21 experimental handling and, owing to its obligatory nature, the difficulties of manipulating the  
22 coral-algal association. Indeed, many studies on the symbiotic partnership are conducted on other  
23 cnidarian model organisms and their results may therefore not be fully transferable to tropical reef-  
24 building corals. Here, we identify the tropical stony coral species *Galaxea fascicularis* as a novel  
25 candidate coral model system. Individual polyps of this species can be separated, enabling highly  
26 replicated genotype studies, and are well suited to experimental investigation of the symbiosis as  
27 they can be easily and effectively rid of their algal symbionts (bleached). We show that bleached  
28 adult individuals can reestablish symbiosis with homologous and heterologous symbionts. We also  
29 report the completion of the gametogenic cycle *ex-situ* and the successful spawning in aquaria over  
30 multiple years. These achievements help overcome several of the major limitations to direct  
31 research on corals and highlight the potential of *G. fascicularis* as an important new model system  
32 for investigations of symbiosis functioning and manipulation.

33

34 **Keywords:** Model organisms; reef-building corals; menthol bleaching; symbiosis manipulation;  
35 *ex situ* sexual reproduction

36

## 37 **Introduction**

38 Reef-building corals form obligatory endosymbiotic association with unicellular algae of the  
39 family Symbiodiniaceae. This association is key to their evolutionary success, but it is also at the  
40 heart of corals' susceptibility to global climate change, which manifests in coral bleaching - the  
41 breakdown of the coral-algal symbiosis (Dietzel et al. 2020). Bleaching is mostly driven by marine  
42 heatwaves which are predicted to worsen, causing the loss of virtually all coral reefs by the end of  
43 this century (van Hooidonk et al. 2016).

44 The interaction between heat stress and bleaching has been studied for more than 30 years (Gates  
45 et al. 1992; McLachlan et al. 2020), but a detailed understanding of the mechanisms underlying  
46 coral bleaching is still missing. Progress in coral symbiosis research is hampered by two main  
47 aspects. First, corals are challenging to maintain in aquarium settings as they tolerate only a narrow  
48 range of environmental conditions. Second, the obligatory nature of the coral-algal association  
49 makes it particularly challenging to physically and functionally separate the partners, an approach  
50 often necessary to unravel the mechanisms underlying symbiosis breakdown and what could  
51 prevent it (Weis et al. 2008; Voolstra 2013).

52 Model organisms are integral for understanding fundamental biological principles and symbiotic  
53 cnidarians have successfully been used as “coral models”, advancing our understanding of coral  
54 bleaching and holobiont functioning (Weis et al. 2008). These model organisms share important  
55 traits with corals, such as being cnidarians that associate with microalgae, yet they also lack other  
56 features that normally represent obstacles to research work such as the calcium carbonate skeleton.

57 In addition, the ability to study the animal host and its algal symbiont in isolation is more easily  
58 achieved with facultatively symbiotic organisms such as *Hydra* spp., *Aiptasia* (*Exaiptasia*  
59 *diaphana*), and *Astrangia* spp. (Dimond and Carrington 2007; Weis et al. 2008; Galliot 2012).

60 Cnidarian model organisms allow the study of basal or shared traits or phenomena at a speed that  
61 would not be possible with reef-building corals, but testing on the latter remains necessary for the  
62 understanding of coral-specific or ecologically relevant aspects. The obligatory symbiosis with  
63 Symbiodiniaceae in reef-building corals has important biological implications (Falkowski et al.  
64 1984; Hoegh-Guldberg 1999), similar to the calcification process that is deeply intertwined with  
65 coral physiology and ecology (Gattuso et al. 1999). It is therefore important to establish a “true”  
66 tropical reef-building coral model species.

67 The richness of the scleractinian taxon offers a vast array of species to choose from in the quest  
68 for a suitable candidate coral model species. These can be evaluated for their tractability (as  
69 amenability to experimental work) considering several aspects which, as proposed by Puntin et al.  
70 (2022) should include: 1) pre-existing knowledge: baseline information of the organism’s biology  
71 is necessary to interpret and contextualize results; 2) compatibility with aquarium rearing: the  
72 possibility to maintain the organism and preferably to complete its life cycle in the lab is essential  
73 to increase its availability, reduce confounding effects such as unknown life history, improve  
74 reproducibility, and lower the pressure on threatened wild populations; 3) amenability to symbiosis  
75 manipulations is necessary to help unravel complex coral-algal functional interactions, and can be  
76 broken down into the organism’s suitability to be rendered aposymbiotic (bleached), to be  
77 maintained aposymbiotic for a certain time, and to then be re-infected with Symbiodiniaceae.

78 We have identified the coral species *Galaxea fascicularis* (Linnaeus, 1767) (clade: Complexa,  
79 family: Euphyllidae) as a promising candidate coral model system. The species is relatively  
80 common across the Indo-Pacific region (Veron et al. 2016), where the phylogeny of the genus  
81 *Galaxea* is geographically well resolved (Wepfer et al. 2020b). It is also one of the more commonly  
82 used species in heat-stress experiments (McLachlan et al. 2020) and in studies on coral

83 calcification (e.g., Marshall and Clode 2004; Al-Horani 2005). Importantly, other community  
84 resources such as an annotated draft genome are available (Liew et al. 2016; Niu et al. 2016,  
85 <http://www.gfas.reefgenomics.org/>). In addition, *G. fascicularis* is known for its tolerance to  
86 stressors as it is “largely unaffected by bleaching” in the field (Marshall and Baird 2000) and for  
87 being easy to grow and propagate in aquaria (Pavia and Estacion 2019). Further, its morphology  
88 provides additional practical advantages with relatively big polyps, which can be easily isolated  
89 (Al-Horani 2005). This conveniently allows reduction of the complexity of the organism from  
90 colonial to individual, enables high clonal replication, and facilitates visualization (Al-Horani et  
91 al. 2003; Marshall and Clode 2004). Its association with Symbiodiniaceae is relatively well  
92 characterized (Huang et al. 2011; Wepfer et al. 2020a). Furthermore, the species’ reproductive  
93 mode and spawning patterns in the wild are well documented (Babcock et al. 1986; Harrison 1988;  
94 Keshavmurthy et al. 2012). However, its amenability to symbiosis manipulation, to experimental  
95 handling of bleached individuals, and the ability to complete gametogenic cycles and spawning in  
96 closed aquaria has not yet been described.

97 The overarching aim of this study was to explore the potential of *Galaxea fascicularis* as a coral  
98 model. Specifically, we investigated: 1) the feasibility to render polyps aposymbiotic by  
99 eliminating Symbiodiniaceae (bleaching), 2) the amenability to experimental manipulation of  
100 symbiotic and aposymbiotic polyps in a simplified system, 3) the re-establishment of the symbiosis  
101 with various species of Symbiodiniaceae, and 4) the possibility to induce full gametogenic cycles  
102 *ex situ*, with subsequent spawning under aquarium conditions. These aspects are central to  
103 overcoming the two main obstacles to coral research work: low tractability of corals and their  
104 complex nature.

105 **Materials and methods**

106 **Coral collection and long-term aquarium rearing**

107 Colonies of *Galaxea fascicularis* were collected from three geographical locations: the Red Sea,  
108 Hong Kong, and the Great Barrier Reef. Red Sea colonies were collected at 9-13 m depth at the  
109 North-Eastern protected end of the reef “Al Fahal” in the central Saudi Arabian Red Sea (22.3054°,  
110 38.9655°) in March 2019, and transported to the Ocean2100 aquarium facility at Justus Liebig  
111 University Giessen (Germany) where they are part of the live collection (CITES permit 19-SA-  
112 000096-PD). In the aquarium system, light was provided by white and blue fluorescent lamps with  
113 a light:dark cycle of 12:12 h at 130 -160  $\mu\text{mol photons m}^{-2} \text{ s}^{-1}$ , which approximates light condition  
114 at the collection site (Ziegler et al. 2015). Salinity was maintained around 35 and temperature at  
115 26 °C. Colonies were fed daily with a combination of frozen copepods, *Artemia*, krill, and *Mysis*.  
116 Hong Kong colonies were collected from 5 m (max. depth) from Crescent Island (22.5308°,  
117 114.3150°) in November 2020 and transported to the University of Hong Kong, where they were  
118 fragmented and acclimated to aquarium conditions for one month. The aquarium system consisted  
119 of 6-L acrylic tanks placed within a Plant Growth Chamber (Panasonic MLR-352H-PA). Each  
120 tank held eight ~3 cm-nubbins and was fitted with a submersible pump (Atman AT301) and a  
121 small water filter (Shiruba PF120). The fragments used in symbiosis reestablishment were fed  
122 twice-weekly with a powdered blend of marine plankton (ReefRoids, Polyp Lab) followed by a  
123 partial water change. Light, salinity, and temperature conditions were consistent with those  
124 maintained in the Ocean2100 facility.

125 For *ex situ* spawning, 35 colonies were collected from Arlington Reef, Great Barrier Reef,  
126 Australia (-16.7000°, 146.0500°) in September 2019, and transported to the Horniman Museum  
127 and Gardens (United Kingdom; CITES permit 585319/01). Colonies were distributed into four

128 coral spawning systems that replicated the natural environmental parameters (seasonal  
129 temperature, photoperiod, solar irradiance, and lunar cycle) required to stimulate reproduction.  
130 Aquarium design and coral husbandry protocol was based on the mesocosms described by Craggs  
131 et al. (2017), and the seasonal temperature profile were based on a non-sequential eight year  
132 average (1998 - 2017) from Moore Reef (-16.8667°, 146.2334°)  
133 (<http://data.aims.gov.au/aimsrtds/datatool.xhtml?site=931&param=water%20temperature>).

#### 134 **Preparation of single polyps for experimentation**

135 For the menthol bleaching and thermal performance experiment, we used single polyps from three  
136 Red Sea colonies each showing distinct coloration (Fig. S1). Replicate clonal polyps were isolated  
137 from each colony using an electric rotary cutter, mounted on coral glue (Grotech, CoraFix  
138 SuperFast), and allowed to heal for two weeks in the Ocean2100 aquarium facility (Schubert and  
139 Wilke 2018).

#### 140 **Menthol bleaching to remove algal symbionts**

141 An equal number of polyps from each colony were randomly assigned to the control group  
142 (maintained in a symbiotic state), and the bleached group (chemically bleached with menthol).  
143 Menthol bleaching followed a protocol modified from Wang et al. (2012) and consisted of three  
144 days of treatment in 0.38 mM menthol solution in seawater, followed by a day of rest and a fourth  
145 day of menthol treatment. Each day the polyps were incubated in menthol for 8 h under light and  
146 stirring (Fig. S2). After, the polys were rinsed and kept in clean containers with air bubbling and  
147 stirring. During menthol treatment, the treated polyps were only exposed to filtered (1.2 µm)  
148 artificial seawater (FASW) to prevent exposure to Symbiodiniaceae. Following, all polyps  
149 (including, for consistency, the symbiotic group) were maintained in FASW.

150 To confirm bleaching, half of the polyps from each group (bleached and symbiotic) and each  
151 colony were visually assessed with a fluorescence stereomicroscope (Leica MZ16 F) 10 days after  
152 the termination of the menthol treatment. Representative pictures were taken under natural light  
153 (brightfield, light source: 2950 K) and under UV light with GF2 filters allowing visualization of  
154 the green fluorescent proteins and chlorophyll (Fig. 1a). Following the same bleaching protocol,  
155 menthol-bleached polyps were also documented using a compound epifluorescence microscope to  
156 reach higher resolution (Leica DM 5500B, TX2 filter) (Fig. 1b).

### 157 **Thermal performance experimental design**

158 Symbiotic and bleached polyps were moved to the experimental tanks on the day after the last  
159 menthol exposure and allowed to recover and acclimate for 10 days. The experimental system  
160 consisted of eight 5-L glass tanks (20 cm × 30 cm) equipped with a small pump (Resun SP-500)  
161 in a temperature-controlled water bath (26 °C). White fluorescent lamps were used to maintain the  
162 light cycle and intensity consistent with long-term rearing conditions. Bleached and symbiotic  
163 polyps were kept in separate tanks (four per group) filled with FASW, with three to six polyps  
164 each (Fig. S3). Polyps were fed each day after the end of the dark incubation, followed by 10 %  
165 water change after 2-3 h. Each polyp was fed one small frozen adult *Artemia* shrimp pipetted  
166 directly on top of the oral opening. The polyps were cleaned every two to three days after the  
167 incubations to remove fouling that would interfere with respirometry measurements.

168 To test the amenability to experimental handling of single polyps and to compare metabolic rates  
169 of bleached and symbiotic polyps, we conducted a thermal performance curve experiment.  
170 Photosynthesis and respiration of *G. fascicularis* polyps were measured across 12 °C temperature  
171 over 10 days. For this, the polyps were acclimated to a different temperature each day, in the



172 following order: 20, 22, 23, 24, 25, 26, 27, 28, 30 to 32 °C. The temperature of the water bath was  
173 changed overnight, and incubations took place the subsequent day at the respective temperature.

#### 174 **Photosynthesis and respiration of symbiotic and bleached polyps**

175 We measured oxygen evolution of individual *G. fascicularis* polyps in light and dark incubations  
176 to calculate net photosynthesis (PN) and dark respiration (R) respectively. For these measurements  
177 four bleached and four symbiotic polyps from three colonies were used (n = 12). Every day, each  
178 polyp was placed in individual 160 mL glass incubation jars (Weck, Germany), equipped with a  
179 magnetic stirrer (~5 cm s<sup>-1</sup>). Three additional jars containing only seawater and stirring bars were  
180 used to control background biological activity. Light intensity of 230 - 280 μmol photons m<sup>-2</sup> s<sup>-1</sup>  
181 during light incubations (ATI 80W Aquablue Special) and temperatures were maintained through  
182 thermostat-controlled water baths placed on a custom-made multiplate stirring system (Rades et  
183 al. 2022).

184 Dissolved oxygen (DO) was measured at the start and at the end of each incubation using a  
185 handheld multiparameter probe (WTW Multi 3620 IDS set). Light incubations lasted 2 h around  
186 mid-day followed by 1.5 h of dark incubation. Net photosynthesis and respiration were calculated  
187 using the following formula (Schneider and Erez 2006):

$$188 \quad PN \text{ or } R [mgO_2 \times cm^{-2} \times h^{-1}] = \frac{\Delta O_2 [mg \times L^{-1}] \times V_{incubation} [L]}{T [h] \times SA [cm^2]}$$

189 Where ΔO<sub>2</sub> is the difference in dissolved oxygen between the end and the start of the incubation  
190 (DO<sub>end</sub> - DO<sub>start</sub>) corrected for the controls' ΔO<sub>2</sub>. This is multiplied by the volume of the incubation  
191 chambers in L (V<sub>incubation</sub>), and divided by incubation time (T) in hours and polyp surface area (SA)  
192 in cm<sup>2</sup>.

### 193 **Surface area measurements**

194 Polyp surface area was measured through photogrammetry. Between 40 to 50 pictures of each  
195 polyp were taken with a phone camera two days before the beginning of the incubations. These  
196 were used to create 3D models with 3DF Zephyr Free (v.4.523), cleaned on Artec3D (Studio 11  
197 Professional v.11.2.2.16), and loaded on MeshLab (v.2016.12, Cignoni et al. 2008) for size scaling  
198 and calculation of live coral surface area.

### 199 **Thermal performance data analysis**

200 All analyses were conducted in the R statistical environment (v.4.1.0, R Core Team 2021) and  
201 plotted with ggplot2 (v.3.3.5, Wickham 2016). The effects of symbiotic state ('symbiotic' vs.  
202 'bleached') or colony identity on net photosynthesis (PN) and respiration (R) were analyzed using  
203 linear mixed-effect models. The effect of symbiotic state on R was tested by setting 'symbiotic  
204 state' as a fixed factor and 'polyp identity', 'colony', and 'temperature' as random factors. The  
205 effect of colony identity on PN and R was tested considering light and dark incubations separately  
206 and setting 'colony identity' as fixed factor and 'polyp identity', 'temperature', and 'symbiotic  
207 state' as random factors. The package 'lmerTest' (v.3.1-3, Kuznetsova et al. 2017) was used to  
208 construct the models and calculate p-values. The package 'performance' was used to check the  
209 residuals of fixed and random factors and to compare alternative models (v.0.7.3, Lüdecke et al.  
210 2021). Differences between colonies were tested as pairwise comparisons of estimated marginal  
211 means (Searle et al. 1980) with Bonferroni correction with the 'emmeans' package (v.1.6.2-1).

### 212 **Symbiosis reestablishment after bleaching**

213 We explored the possibility of returning polyps to the symbiotic state after menthol bleaching  
214 using three approaches. The first and simplest approach consisted of testing natural symbiont  
215 acquisition. One month after the menthol treatment, bleached polyps were placed next to symbiotic

216 colonies of *G. fascicularis* to expose them to Symbiodiniaceae naturally released from conspecifics  
217 into the water column. The second approach consisted of inoculating bleached polyps with freshly  
218 isolated Symbiodiniaceae from symbiotic *G. fascicularis*. For this, a donor polyp from each colony  
219 was placed upside-down inside a 1.5 mL tube and centrifuged (Heraeus Biofuge Pico, England) at  
220 8,300 g for 1 min to detach the tissue from the skeleton (Wilkinson et al. 2016). The slurry was  
221 homogenized with 600 µl of FASW, centrifuged at 3,400 g for 1 min, and the resulting pellet  
222 resuspended twice to clean the algal fraction. This Symbiodiniaceae suspension was used to  
223 inoculate two to three polyps each with Symbiodiniaceae from the same colony or from one  
224 respective other colony. For the inoculation, bleached polyps were placed in individual beakers,  
225 the Symbiodiniaceae inoculum was pipetted on the oral opening together with one *Artemia* shrimp,  
226 and allowed to feed for 3 h. Subsequently, inoculated polyps were transferred to the long-term  
227 rearing aquarium facility. Symbiosis reestablishment was visually assessed after one month  
228 (Fig. 3).

229 The third approach consisted of inoculating menthol-bleached coral nubbins with cultured  
230 Symbiodiniaceae. Two species of symbionts, *Cladocopium goreau* and *Durusdinium trenchii*  
231 were chosen for targeted reinfection of the bleached fragments, as species from both these genera  
232 are known to form stable symbiosis with *G. fascicularis* across the South China Sea (Tong et al.  
233 2017). Batch cultures of *C. goreau* (AIMS-SCF-055, isolated from *Acropora tenuis*) and *D.*  
234 *trenchii* (AIMS-SCF-088, isolated from *A. muricata*) were obtained from the Symbiont Culture  
235 Facility at the Australian Institute of Marine Science and maintained in f/2 media (Guillard 1975)  
236 under the same conditions as the corals. A total of 16 fragments were inoculated with a  
237 concentration of 200 symbiont cells ml<sup>-1</sup> in each 6-L aquarium. The concentration of symbionts  
238 was divided in a 90:10 ratio (180 cells ml<sup>-1</sup> *D. trenchii* : 20 cells ml<sup>-1</sup> *C. goreau*). This ratio was

239 chosen because *G. fascicularis* is more commonly associated with symbionts from the genus  
240 *Cladocopium* under the temperature conditions of this experiment (Dong et al. 2009; Zhou et al.  
241 2017b). The symbiont aliquots were centrifuged to remove the culture media, washed once with  
242 FASW before final resuspension in 10 mL FASW. The bleached fragments were first fed with  
243 ReefRoids before being exposed to the chosen symbionts. For this, a suspension of ReefRoids in  
244 ASW was pipetted directly into the oral opening of each polyp. The same process was then  
245 immediately repeated with the suspended symbionts. Aquarium filters were turned off for 1 h to  
246 allow the corals to feed and to prevent removal of symbiont cells from the water column.  
247 Fragments were inoculated twice a week for 6 weeks, until symbiosis reestablishment was visually  
248 confirmed. Symbiodiniaceae populations *in hospite* were then characterized with fluorescent in-  
249 situ hybridization (FISH) and flow cytometry (McIlroy et al. 2020).

#### 250 **Fluorescent In-Situ Hybridisation (FISH)**

251 After 6 weeks of inoculation, a single polyp was removed from each fragment with a chisel. Tissue  
252 was removed from the skeleton with an airbrush containing deionized water. The resulting slurry  
253 was homogenized using a 20- $\mu$ l pipette tip. 1.5 mL of homogenate was transferred to a 2-mL  
254 Eppendorf tube and centrifuged at 500 rpm for seven minutes, after which the supernatant was  
255 discarded. The remaining pellet was washed once before being preserved in 5X SET buffer and  
256 stored at -80 °C for further analysis.

257 Samples were prepared following an adapted protocol from McIlroy et al. (2020). Briefly, after  
258 washing with 5X SET in IGEPAL at 0.4 and 0.1 % vol/vol samples were split equally between  
259 three 1.5-mL black Eppendorf tubes. Each sample had one tube treated with a SymC probe, one  
260 tube with a SymD probe and one without any probe as a control. Both SymC and SymD probes  
261 were designed to have genus-level specificity for *Cladocopium* and *Durusdinium*, respectively.

262 After overnight hybridization at 45 °C (5X SET, 0.1 % vol/vol IGE- PAL, 10 % vol/vol formamide  
263 and 100 pmol of the relevant probe), samples were washed once in warm 1X SET, vortexed and  
264 resuspended in 500 µl of 1X SET for same-day cytometric analysis on a BD FACSAria Fusion  
265 flow cytometer (BD Biosciences, CA). FlowJo™ Software (v.10.8.1, BD Life Sciences) was used  
266 to determine the percentage of probe-positive cells (either *Cladocopium* or *Durusdinium*), to  
267 identify a) the presence and b) the relative abundance of each algal genus within the sample.

### 268 **Completing gametogenic cycles and *ex-situ* spawning**

269 *Galaxea fascicularis* in the GBR spawns between October and December, 0.05-200 minutes after  
270 sunset (MAS) and 1 – 8 nights after full moon (NAFM) (Babcock et al. 1986; Baird et al. 2021).  
271 To determine if the *ex situ* reproductive pattern remained in synchrony with the wild we followed  
272 our colonies over three consecutive reproductive seasons (2019 – 2021).

273 To ascertain gamete development in each colony, two months prior to predicted spawning, and  
274 two to four days prior to the full moon, whole polyps were removed from each colony and  
275 longitudinal sections imaged (Canon 5d MKIII, Fig. 4a,d). Based on the stage of gamete  
276 development in these sections *ex situ* spawning activity was predicted.

277 To record spawning observations each year, colonies were observed with red head torches during  
278 the predicted spawning months. Observations commenced two NAFM and 30 mins prior to the  
279 predicted spawning time, during which time the broodstock aquariums were isolated from the  
280 filtration system. In addition, all internal water pumps were also turned off leaving the aquariums'  
281 water static. Observations continued over multiple consecutive nights until all colonies that had  
282 developed gametes, during that reproductive season, spawned. Spawning date and time of each  
283 colony was recorded, with onset of spawning being denoted as the time of first gamete release.

284 Following release, gametes were pooled to allow fertilization to occur, and subsequent embryos  
285 were reared and larvae settled following the method described by Craggs et al. (2019).

## 286 **Results**

### 287 **Production of single polyps and long-term rearing of bleached polyps**

288 We produced clonal replicates of *G. fascicularis* colonies from the Red Sea and Hong Kong and  
289 bleached them with menthol. All polyps (n = 24, including additional polyps not used in this  
290 experiment) and all coral fragments (n = 16) survived the menthol treatment and appeared visually  
291 completely white. Visual inspection under a fluorescent stereomicroscope revealed no detectable  
292 algal cells in the bleached polyps (Red Sea colonies, Fig. 1a), but inspection at higher  
293 magnification (compound fluorescent microscope, ×400) revealed the presence of few scattered  
294 algal cells, limited to the base of the tentacles (Fig. 1b).

295 All polyps that were employed in the thermal performance experiment (n = 12) remained visually  
296 completely bleached and viable throughout the 10 days of temperature treatment, with the  
297 exception of two polyps that appeared dead on the 7<sup>th</sup> and 8<sup>th</sup> day of incubation, respectively. These  
298 polyps showed atrophic and unresponsive tentacles, and overall thinning of the soft tissue until it  
299 was not recognizable. Overall, we successfully maintained the bleached polyps for three weeks  
300 from the termination of the menthol treatment.

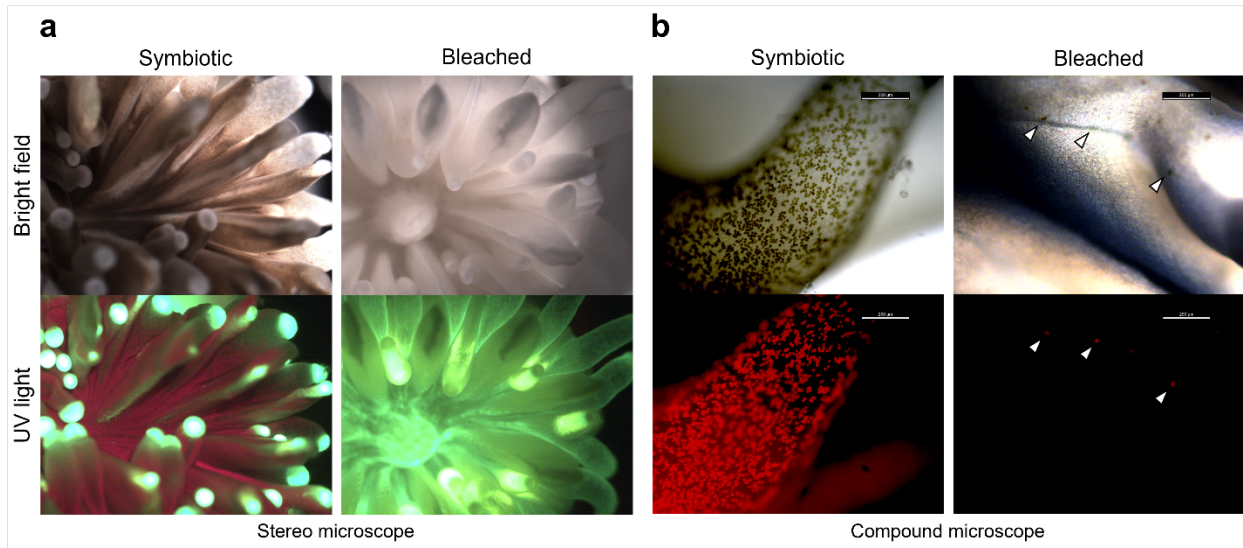

301

302 **Fig. 1 Microscopic comparison between symbiotic and menthol-bleached polyps.**

303 Representative stereo and compound micrographs in bright field and UV light, with filters for  
304 chlorophyll (red) and coral tissue (green) autofluorescence. **a** Symbiodiniaceae cells are abundant  
305 in symbiotic polyps while not detectable in bleached polyps. **b** At higher magnifications, few algal  
306 cells are still detectable in bleached polyps only at the base of the tentacles (arrows)

### 307 **Amenability to experimental manipulation and broad thermal tolerance**

308 Symbiotic (untreated) polyps had positive net photosynthesis across all temperatures from 21 to  
309 32 °C (Fig. 2). Net photosynthesis peaked at 23 °C (mean 13.05  $\mu\text{g O}_2 \text{ cm}^{-2} \text{ h}^{-1}$ ) and reached the  
310 minimum at 32 °C (mean 3.26  $\mu\text{g O}_2 \text{ cm}^{-2} \text{ h}^{-1}$ ). In contrast, respiration overall increased with  
311 temperature with minimum values at 21 °C (mean 5.77  $\mu\text{g O}_2 \text{ cm}^{-2} \text{ h}^{-1}$ ) and maximum at 32 °C  
312 (mean 25.70  $\mu\text{g O}_2 \text{ cm}^{-2} \text{ h}^{-1}$ ; Fig. 2). Bleached polyps, as expected by their lack of photosymbionts,  
313 exhibited a net oxygen depletion. Similar to symbiotic polyps, respiration in bleached polyps  
314 increased with temperature, both in light and dark incubations (Fig. 2). Overall, respiration in  
315 symbiotic polyps was higher than in bleached polyps ( $P_{\text{mer}} < 0.001$ ).

316 While net photosynthesis was similar between colonies ( $P_{\text{Imer}} > 0.05$ ), respiration was significantly  
317 higher in one colony ( $P_{\text{Imer}} < 0.001$ ) compared to the other two (RS2-RS1:  $P_{\text{Bonf}} < 0.01$ ; RS2-RS3:  
318  $P_{\text{Bonf}} < 0.001$ ; RS1-RS3:  $P_{\text{Bonf}} > 0.05$ ; Fig. S4).

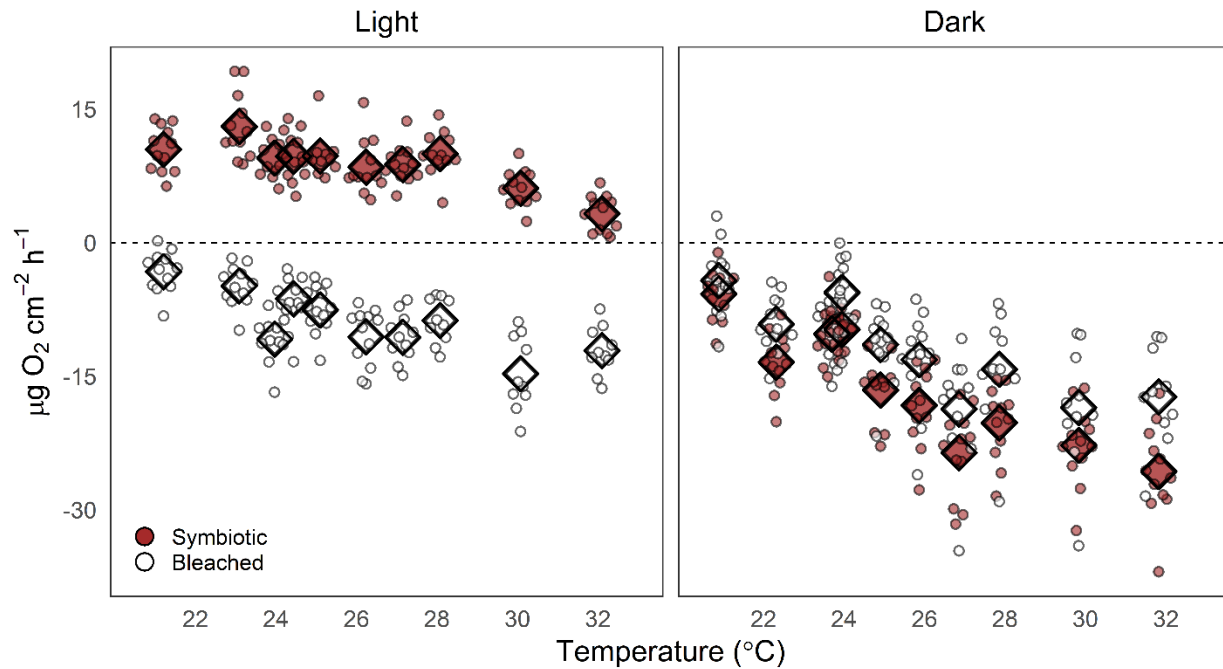

319

320 **Fig. 2 Net photosynthesis and respiration rate of symbiotic states in *Galaxea fascicularis*.**

321 Symbiotic (brown symbols) and Bleached (white symbols) polyps in light and dark incubations.

322 Noise added (jittering) for ease of visualization, means per group depicted as diamonds. n = 12

### 323 **Symbiosis re-establishment after bleaching**

324 Natural symbiont uptake by placing menthol-bleached polyps next to symbiotic colonies resulted

325 in the re-establishment of the coral algal symbiosis. In the long-term, these polyps grew into small  
326 colonies that were visually indistinguishable from untreated corals (Fig. S5a). The degree and

327 speed of repopulation differed between polyps from different colonies. One month after natural

328 uptake, polyps from one colony appeared fully symbiotic while polyps from another colony were

329 only intermediately populated (Fig. 3a).



330 Inoculation with freshly isolated Symbiodiniaceae was followed by symbiont repopulation in three  
331 out of seven bleached polyps. These belonged to the same colony and repopulation was  
332 independent of the source inoculum (i.e. symbionts isolated from the same or from a different  
333 colony). Similar to the successfully repopulated polyps from natural uptake, successfully  
334 inoculated polyps grew into small colonies visually indistinguishable from untreated corals one  
335 year later (Fig. S5b).

336 Inoculation with cultured symbionts resulted in successful symbiosis re-establishment for 100 %  
337 of the samples (n = 16), which were macroscopically visibly symbiotic. Of these, nine samples  
338 were successfully FISH hybridized, with the genus-specific probes identifying the presence of both  
339 target genera in each sample (Fig. 3b). Individual variation in the relative ratio of each genus was  
340 evident among the fragments, with *Durusdinium* contributing to 4 – 63 % of cells and  
341 *Cladocopium* to 37 – 82 % (Fig. 3b). A small, but significant proportion of symbionts remained  
342 unlabeled in some samples. These may represent additional symbiont genera or be the result of  
343 variable probe efficiency.

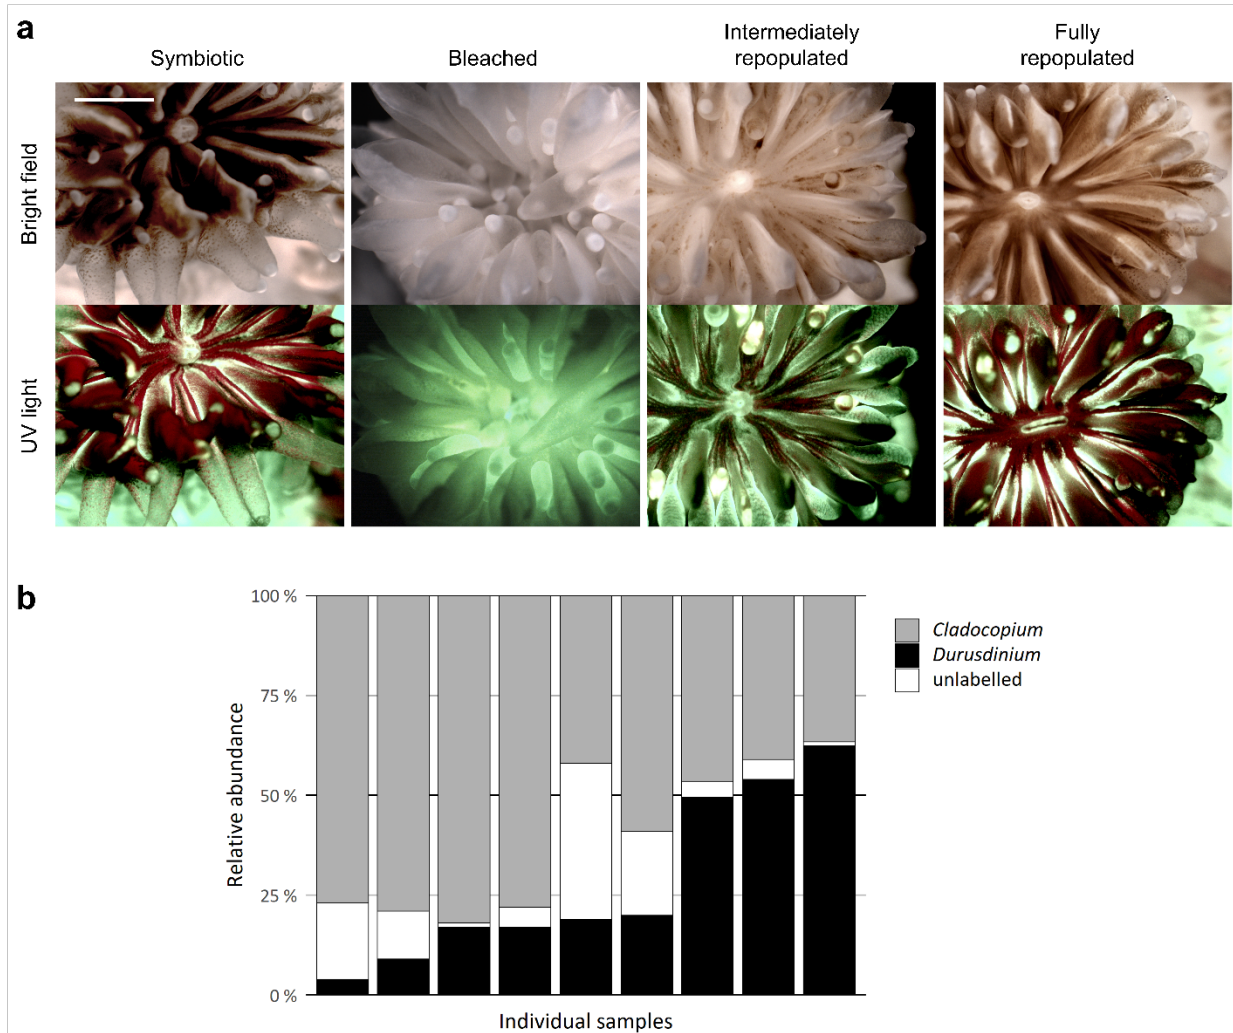

344

345 **Fig. 3 Symbiosis reestablishment of menthol-bleached polyps following inoculation with**

346 **Symbiodiniaceae. a** Representative stereomicrographs of untreated ('Symbiotic') polyp and fully

347 aposymbiotic ('Bleached') polyp 10 days after menthol treatment. One month after inoculation

348 with freshly isolated Symbiodiniaceae, polyps originating from different colonies show different

349 degrees of repopulation. UV light visualizes chlorophyll (red) and host tissue (green) fluorescence.

350 Bright field: natural light (2950 K); UV light + GF2 filter; (Leica, MZ16 F). Scale bar = 2 mm. **b**

351 Relative abundance (%) of *Cladocopium* (gray), *Durusdinium* (black), and unlabeled cells (white)

352 following menthol bleaching and inoculation with cultured algae of these genera. The presence of

353 both genera is confirmed, with individual variation in relative ratios across fragments (n = 9).

354 **Ex-situ spawning**

355 Spawning was observed each year over the three-year observation period for all 35 colonies.  
356 Annual fecundity, as a percentage of colonies completing a full gametogenic cycle, was 43.97 %  
357 (3.02 sd) (2019: 40.48 %, 2020 and 2021: 45.71 %) during these three spawning cycles.  
358 Spawning occurred in synchrony with wild predictions, with gametes being released in November  
359 and December each year, between 0.26 - 259 MAS and 5 - 9 NAFM (Fig. 4b-c & e-f). Following  
360 embryo rearing, Symbiodiniaceae were observed within primary polyps 14 days post settlement  
361 (Fig. 4g). Polyps were fully developed 40 days post settlement (Fig. 4h) and grew into small  
362 colonies within the first six months (Fig. 4i).

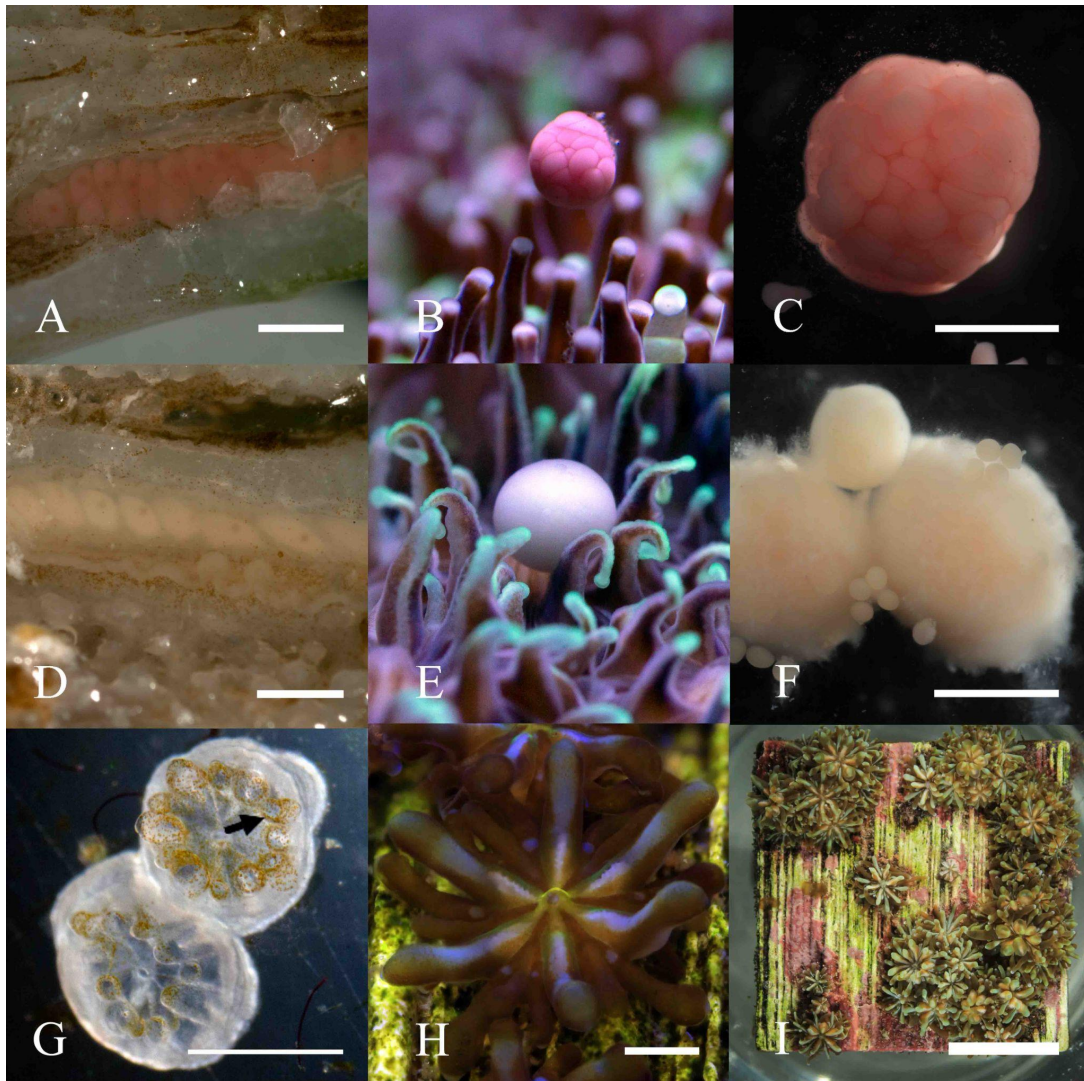

363

364

365

366

367

368

369

370

371

**Fig. 4 *Galaxea fascicularis* spawning *ex situ*.** Representative images of gamete development and spawning in female and male colonies. **a** Longitudinal section of female polyp with pinkish-red pigmented oocytes. **b** Female colony releasing oocyte bundle *ex situ*. **c** Close-up of female bundle post release. **d** Longitudinal section of male polyp with white oocytes. **e** Male colony releasing oocytes/sperm bundle *ex situ*. **f** Close-up of male gamete bundles post release undergoing disassociation. **g** Newly settled *G. fascicularis* primary polyps showing initial Symbiodiniaceae (arrow) uptake 14 days post settlement. **h** Primary polyp 40 days post settlement. **i** Multiple colonies six months post settlement. Scale bar: a-h = 1 mm, i = 1 cm

## 372 **Discussion**

373 Here, we explored the potential of *G. fascicularis* as a novel coral model by assessing its  
374 amenability to aquarium rearing, experimental handling, and symbiosis manipulation.

### 375 **Successful bleaching with menthol**

376 We showed that *G. fascicularis* can be readily and reliably rendered aposymbiotic through menthol  
377 bleaching, similar to other cnidarian model systems (e.g., Matthews et al. 2015; Röthig et al. 2021).  
378 We lowered the menthol concentration in the protocol developed by Wang et al. (2012) to further  
379 limit stress on the host, and indeed all coral polyps survived this bleaching procedure on three  
380 independently replicated occasions. Overall, menthol treatment was very effective, with only a  
381 few algal cells remaining at the base of the tentacles. From a photophysiological perspective, these  
382 scant remnants can be considered negligible, as illustrated by the light and dark oxygen production  
383 data. Furthermore, bleached polyps remained aposymbiotic for weeks and we therefore considered  
384 this bleaching protocol suitable for experimental investigation of aposymbiotic *G. fascicularis* in  
385 physiological studies and symbiosis manipulation. However, as menthol has photo-inhibitory  
386 (Wang et al. 2012; Clowez et al. 2021) and antimicrobial properties (İşcan et al. 2002), further  
387 studies should investigate the effects of menthol bleaching on the remaining microbiome.

### 388 **Tractability of symbiotic and aposymbiotic *G. fascicularis***

389 Tractability, as amenability to experimental work and laboratory conditions, is one of the most  
390 important requirements for model organisms. The *G. fascicularis* polyps and fragments could be  
391 maintained for three and ten weeks respectively in simple systems consisting of small independent  
392 tanks (5-6 L) with regular feeding and basic water quality care. These time frames match the  
393 requirements for most experimental designs and we believe could be further extended. Indeed,  
394 symbiotic individuals looked healthy and responsive throughout the whole period, testifying to a

395 comparatively hardy coral with only low demands on rearing conditions. Additionally, the positive  
396 net photosynthetic rate across a large temperature range confirmed the broad thermal tolerance of  
397 this species (Al-Horani 2005; McIlroy et al. 2019), which was retained in the simplified single  
398 polyp application.

399 Moreover, bleached polyps could be maintained in the simple experimental system for three weeks  
400 even with the additional stress of the thermal experiment. However, they showed signs of  
401 deteriorating condition over time indicating that not all nutritional needs were met. Thus one  
402 priority is to develop bespoke feed for long-term rearing of bleached coral polyps (Wang et al.  
403 2012).

#### 404 **Thermal performance of symbiotic and aposymbiotic *G. fascicularis***

405 Studies that compare symbiotic and aposymbiotic coral holobionts are particularly informative for  
406 understanding coral response to climate change, and therefore we investigated the comparability  
407 between symbiotic and aposymbiotic *G. fascicularis* polyps. As expected, these differed in their  
408 photosynthetic rates, where the latter were net oxygen consumers even under illumination. Overall,  
409 symbiotic polyps had higher respiration rates than aposymbiotic polyps, which could be ascribed  
410 to the additional metabolic burden of the associated Symbiodiniaceae, as well as a greater  
411 metabolic capacity derived from the availability of photosynthates (Muscatine et al. 1981; Al-  
412 Horani et al. 2003). For all polyps, respiration rates overall increased with temperature in line with  
413 optimum thermal performance of corals and macroalgae from the central Red Sea (27-33 °C)  
414 (Anton et al. 2020).

415 Interestingly, we observed intraspecific variability in physiological performance. One colony had  
416 significantly higher respiration rates than the others (Fig. S4). This manifested exclusively under  
417 dark conditions and was therefore more likely linked to host rather than symbiont identity. This

418 variability warrants further investigations to better characterize host genotypes, as in the long term  
419 it will be necessary to establish representative host clonal lines.

#### 420 **Symbiosis reestablishment in adult corals**

421 We showed that bleached *G. fascicularis* polyps successfully reestablished symbiosis with  
422 Symbiodiniaceae using qualitative and quantitative approaches. The simpler approaches included  
423 exposure to symbionts through the water medium (by proximity with symbiotic colonies), and a  
424 one-time raw inoculum of Symbiodiniaceae. In the short-term, bleached hosts retained the ability  
425 to feed, which facilitates symbiont uptake (Fitt and Trench 1983) and likely contributes to  
426 symbiosis re-establishment. In the long-term, these polyps continued to grow into small colonies  
427 and became visually indistinguishable from the untreated controls. Therefore, these trials allowed  
428 us to qualitatively demonstrate that symbiosis reestablishment of aposymbiotic adults after  
429 menthol treatment is possible.

430 Further, the quantitative approach also demonstrated that it is possible to reestablish symbiosis in  
431 adult *G. fascicularis* with cultured Symbiodiniaceae. Remarkably, these were likely heterologous  
432 strains (different from the natively associated ones) as they were initially isolated from *Acropora*  
433 spp. from the GBR (Australia) and inoculated to *G. fascicularis* from Hong Kong. The  
434 experimental repopulation of adult corals with cultured heterologous symbionts has only recently  
435 been demonstrated (Scharfenstein et al. 2022), and it is particularly relevant in the context of  
436 symbiosis manipulations to enhance heat tolerance in reef-building corals (van Oppen et al. 2015).  
437 Further assessments of Symbiodiniaceae identity from algal cultures, symbiotic corals, and  
438 inoculated corals are however necessary to confirm that this heterologous symbiosis  
439 reestablishment occurred in our experiment.

440 Nevertheless, our targeted inoculation highlighted other interesting prospects for symbiosis  
441 manipulations. The high thermal tolerance of *G. fascicularis* (Marshall and Baird 2000) has been  
442 hypothesized to be linked to its flexible host-algal association, where *Cladocopium*, *Durusdinium*,  
443 and their simultaneous co-occurrence have been documented, and with an equatorial-ward shift  
444 from *Cladocopium* dominance to *Durusdinium* dominance (Huang et al. 2011, and references  
445 therein). At Hong Kong's latitude, and at our rearing temperature, *G. fascicularis* is expected to  
446 be exclusively associated with *Cladocopium* (Huang et al. 2011; Zhou et al. 2017a), yet the  
447 targeted inoculation produced mixed-genus associations. This shows that targeted inoculation can  
448 successfully shift Symbiodiniaceae community composition towards a higher proportion of heat  
449 tolerant strains (Silverstein et al. 2015) without thermal treatment. Although the longevity of these  
450 partnerships is still unclear, these are promising results for future development of *in hospite* studies  
451 on the role of temperature on inter-partner symbiosis dynamics.

#### 452 ***Ex situ* spawning**

453 *Galaxea fascicularis* is a good model species candidate for sexual reproductive work due its high  
454 survivorship in aquarium conditions. As demonstrated herein, a combination of seasonal  
455 programming and husbandry enabled the species to complete a full gametogenic cycle *ex situ* over  
456 multiple years, which closely mimics that observed in the wild (Babcock et al. 1986; Baird et al.  
457 2021). Furthermore, we showed *in vitro* fertilization, embryological development, and *ex situ*  
458 larval settlement resulting in spat of known ages. As the age at which the species reaches sexual  
459 maturity is currently unknown, future studies should focus on this aspect, which is also important  
460 for producing an F2 generation and for closing the species life cycle *ex situ* (Craggs et al. 2020).  
461 Access to a F2 generation of known parental lineage will provide a platform to conduct  
462 experiments in areas such as mapping quantitative trait loci (Zhang 2012) or phenotypic traits such



463 as growth, disease resistance, or thermal tolerance (van Oppen et al. 2015). It also opens  
464 possibilities for studies on heritability in symbiont selection, and for rearing of axenic or  
465 gnotobiotic coral lineages, paralleling procedures established for *Hydra* (Fraune et al. 2015).

## 466 **Conclusions**

467 The study of coral-algal symbiosis has been constrained by the difficulties of maintaining corals  
468 *ex situ* and of manipulating the coral-algal association to unravel symbiosis functioning. Here, we  
469 showed that adopting *G. fascicularis* as a model system can alleviate these limitations. Its  
470 demonstrated compatibility to rearing in simplified systems and experimental applications,  
471 together with the repeated spawning in aquaria, confirm the high tractability of this coral species.  
472 Further, the possibility to readily obtain aposymbiotic individuals suitable for detailed study and  
473 symbiosis re-establishment set the stage for exciting future developments in coral symbiosis  
474 research which is necessary to understand corals' potential to cope with changing oceans.  
475 Besides these strengths, our study also highlights areas worth future efforts on the path to  
476 developing the *G. fascicularis* model system further. These include: i) better characterization of  
477 the effect of menthol on the rest of the coral microbiome (e.g., bacteria); ii) development of custom  
478 feed for long-term maintenance of bleached individuals; iii) assessment of long-term persistence  
479 of heterologous Symbiodiniaceae, and testing of a variety of symbiont strains to understand the  
480 breadth of symbiont diversity that can be accommodated by the *G. fascicularis* host; iv) further  
481 characterization of host colonies and genotypes with the aim of establishing clonal lines, mirroring  
482 for example the development of the *Aiptasia* model; and v) development of collaborative platforms  
483 and open-access community resources around this emerging model system to accelerate research  
484 and discovery.

485 **Acknowledgements**

486 We thank Dr. Jafargholi Imani and Dr. Kathrin Ehlers (both JLU) for access and guidance in the  
487 fluorescence microscope facilities, André Dietzmann and Catarina P. P. Martins (both JLU) for  
488 assistance during experiments, and the Li Ka Shing Faculty of Medicine Core Facility (HKU) for  
489 the flow cytometry equipment.

490 **Data and code availability**

491 Data and R scripts used for this study are available at:  
492 [https://github.com/sPuntinG/Galaxea\\_Coral\\_Model/](https://github.com/sPuntinG/Galaxea_Coral_Model/)

493 **Author contributions**

494 GP and MZ conceived and designed the study. GP, JC, RH, KEE, SM produced and analyzed data.  
495 MS, DMB, MZ contributed reagents/materials/analysis tools. GP and MZ wrote the first draft with  
496 contributions from all authors.

497 **Conflict of Interest**

498 The authors declare no conflict of interest for this submission.

499 **References**

- 500 Al-Horani FA (2005) Effects of changing seawater temperature on photosynthesis and  
501 calcification in the scleractinian coral *Galaxea fascicularis*, measured with O<sub>2</sub>, Ca<sup>2+</sup> and pH  
502 microsensors. *Sci Mar* 69:347–354  
503 <http://scientiamarina.revistas.csic.es/index.php/scientiamarina/article/view/263/261>
- 504 Al-Horani FA, Al-Moghrabi SM, de Beer D (2003) The mechanism of calcification and its  
505 relation to photosynthesis and respiration in the scleractinian coral *Galaxea fascicularis*.  
506 *Mar Biol* 142:419–426 <http://link.springer.com/10.1007/s00227-002-0981-8>
- 507 Anton A, Randle JL, Garcia FC, Rossbach S, Ellis JI, Weinzierl M, Duarte CM (2020)  
508 Differential thermal tolerance between algae and corals may trigger the proliferation of  
509 algae in coral reefs. *Glob Chang Biol* 26:4316–4327  
510 <https://onlinelibrary.wiley.com/doi/10.1111/gcb.15141>
- 511 Babcock RC, Bull GD, Harrison PL, Heyward AJ, Oliver JK, Wallace CC, Willis BL (1986)  
512 Synchronous spawnings of 105 scleractinian coral species on the Great Barrier Reef. *Mar*  
513 *Biol* 90:379–394 <http://link.springer.com/10.1007/BF00428562>
- 514 Baird AH, Guest JR, Edwards AJ, et al. (2021) An Indo-Pacific coral spawning database. *Sci*  
515 *Data* 8:35 <http://www.nature.com/articles/s41597-020-00793-8>
- 516 Cignoni P, Callieri M, Corsini M, Dellepiane M, Ganovelli F, Ranzuglia G (2008) MeshLab: an  
517 Open-Source Mesh Processing Tool.
- 518 Clowez S, Renicke C, Pringle JR, Grossman AR (2021) Impact of menthol on growth and  
519 photosynthetic function of *Breviolum minutum* (Dinoflagellata, Dinophyceae,  
520 Symbiodiniaceae) and interactions with its *Aiptasia* host. *J Phycol* 57:245–257  
521 <https://onlinelibrary.wiley.com/doi/10.1111/jpy.13081>
- 522 Craggs J, Guest JR, Bulling M, Sweet M (2019) Ex situ co culturing of the sea urchin, *Mespilia*  
523 *globulus* and the coral *Acropora millepora* enhances early post-settlement survivorship. *Sci*  
524 *Rep* 9:12984 <http://www.nature.com/articles/s41598-019-49447-9>
- 525 Craggs J, Guest JR, Davis M, Simmons J, Dashti E, Sweet M (2017) Inducing broadcast coral  
526 spawning ex situ: closed system mesocosm design and husbandry protocol. *Ecol Evol*

- 527 7:11066 <https://onlinelibrary.wiley.com/doi/10.1002/ece3.3538>
- 528 Craggs J, Guest JR, Davis M, Sweet M (2020) Completing the life cycle of a broadcast spawning  
529 coral in a closed mesocosm. *Invertebr Reprod Dev* 64:244–247  
530 <https://doi.org/10.1080/07924259.2020.1759704>
- 531 Dietzel A, Bode M, Connolly SR, Hughes TP (2020) Long-term shifts in the colony size  
532 structure of coral populations along the Great Barrier Reef. *Proc R Soc B Biol Sci*  
533 287:20201432 <https://royalsocietypublishing.org/doi/10.1098/rspb.2020.1432>
- 534 Dimond J, Carrington E (2007) Temporal variation in the symbiosis and growth of the temperate  
535 scleractinian coral *Astrangia poculata*. *Mar Ecol Prog Ser* 348:161–172 <http://www.int-res.com/abstracts/meps/v348/p161-172/>
- 537 Dong Z-J, Huang H, Huang L-M, Li Y-C (2009) Diversity of symbiotic algae of the genus  
538 *Symbiodinium* in scleractinian corals of the Xisha Islands in the South China Sea. *J Syst*  
539 *Evol* 47:321–326 <https://onlinelibrary.wiley.com/doi/10.1111/j.1759-6831.2009.00034.x>
- 540 Falkowski PG, Dubinsky Z, Muscatine L, Porter JW (1984) Light and the bioenergetics of a  
541 symbiotic coral. *Bioscience* 34:705–709 <https://academic.oup.com/bioscience/article-lookup/doi/10.2307/1309663>
- 543 Fitt WK, Trench RK (1983) Endocytosis of the symbiotic dinoflagellate *Symbiodinium*  
544 *microadriaticum* Freudenthal by endodermal cells of the scyphistomae of *Cassiopeia*  
545 *xamachana* and resistance of the algae to host digestion. *J Cell Sci* 64:195–212
- 546 Fraune S, Anton-Erxleben F, Augustin R, Franzenburg S, Knop M, Schröder K, Willoweit-Ohl  
547 D, Bosch TCG (2015) Bacteria–bacteria interactions within the microbiota of the ancestral  
548 metazoan *Hydra* contribute to fungal resistance. *ISME J* 9:1543–1556  
549 <http://www.nature.com/articles/ismej2014239>
- 550 Galliot B (2012) *Hydra*, a fruitful model system for 270 years. *Int J Dev Biol* 56:411–423  
551 <http://www.intjdevbiol.com/paper.php?doi=120086bg>
- 552 Gates RD, Baghdasarian G, Muscatine L (1992) Temperature stress causes host cell detachment  
553 in symbiotic cnidarians: implications for coral bleaching. *Biol Bull* 182:324–332  
554 <https://www.journals.uchicago.edu/doi/10.2307/1542252>

- 555 Gattuso J-P, Allemand D, Frankignoulle M (1999) Photosynthesis and Calcification at Cellular,  
556 Organismal and Community Levels in Coral Reefs: A Review on Interactions and Control  
557 by Carbonate Chemistry. *Am Zool* 39:160–183 [https://academic.oup.com/icb/article-](https://academic.oup.com/icb/article-lookup/doi/10.1093/icb/39.1.160)  
558 [lookup/doi/10.1093/icb/39.1.160](https://academic.oup.com/icb/article-lookup/doi/10.1093/icb/39.1.160)
- 559 Guillard RRL (1975) Culture of Phytoplankton for Feeding Marine Invertebrates. In: Smith,  
560 W.L., Chanley M.H. (eds) *Culture of Marine Invertebrate Animals*. Springer US, Boston,  
561 MA, pp 29–60 [http://link.springer.com/10.1007/978-1-4615-8714-9\\_3](http://link.springer.com/10.1007/978-1-4615-8714-9_3)
- 562 Harrison PL (1988) Pseudo-gynodioecy: an unusual breeding system in the scleractinian coral  
563 *Galaxea fascicularis*. 699–705  
564 [https://researchportal.scu.edu.au/esploro/outputs/conferencePaper/Pseudo-gynodioecy-an-](https://researchportal.scu.edu.au/esploro/outputs/conferencePaper/Pseudo-gynodioecy-an-unusual-breeding-system-in-the-scleractinian-coral-Galaxea-fascicularia/991012821519702368)  
565 [unusual-breeding-system-in-the-scleractinian-coral-Galaxea-](https://researchportal.scu.edu.au/esploro/outputs/conferencePaper/Pseudo-gynodioecy-an-unusual-breeding-system-in-the-scleractinian-coral-Galaxea-fascicularia/991012821519702368)  
566 [fascicularia/991012821519702368](https://researchportal.scu.edu.au/esploro/outputs/conferencePaper/Pseudo-gynodioecy-an-unusual-breeding-system-in-the-scleractinian-coral-Galaxea-fascicularia/991012821519702368)
- 567 Hoegh-Guldberg O (1999) Climate change, coral bleaching and the future of the world’s coral  
568 reefs. *Mar Freshw Res* 50:839–866 <http://www.publish.csiro.au/?paper=MF99078>
- 569 van Hooedonk R, Maynard J, Tanelander J, Gove J, Ahmadi G, Raymundo L, Williams G,  
570 Heron SF, Planes S (2016) Local-scale projections of coral reef futures and implications of  
571 the Paris Agreement. *Sci Rep* 6:39666 <http://www.nature.com/articles/srep39666>
- 572 Huang H, Dong Z, Huang L, Yang J, Di B, Li Y, Zhou G, Zhang C (2011) Latitudinal variation  
573 in algal symbionts within the scleractinian coral *Galaxea fascicularis* in the South China  
574 Sea. *Mar Biol Res* 7:208–211  
575 <http://www.tandfonline.com/doi/abs/10.1080/17451000.2010.489616>
- 576 İşcan G, Kirimer N, Kürkcüoğlu M, Hüsnü Can Başer, Demirci F (2002) Antimicrobial  
577 screening of *Mentha piperita* essential oils. *J Agric Food Chem* 50:3943–3946  
578 <https://doi.org/10.1021/jf011476k>
- 579 Keshavmurthy S, Hsu CM, Kuo CY, Denis V, Leung JKL, Fontana S, Hsieh HJ, Tsai W Sen, Su  
580 WC, Chen CA (2012) Larval development of fertilized “pseudo-gynodioecious” eggs  
581 suggests a sexual pattern of gynodioecy in *Galaxea fascicularis* (Scleractinia: Euphyllidae).  
582 *Zool Stud* 51:143–149

- 583 Kuznetsova A, Brockhoff PB, Christensen RHB (2017) lmerTest Package: Tests in Linear Mixed  
584 Effects Models. J Stat Softw 82:1–26  
585 <https://www.jstatsoft.org/index.php/jss/article/view/v082i13>
- 586 Liew YJ, Aranda M, Voolstra CR (2016) Reefgenomics.Org - a repository for marine genomics  
587 data. Database 2016:baw152 [https://academic.oup.com/database/article-](https://academic.oup.com/database/article-lookup/doi/10.1093/database/baw152)  
588 [lookup/doi/10.1093/database/baw152](https://academic.oup.com/database/article-lookup/doi/10.1093/database/baw152)
- 589 Lüdecke D, Ben-Shachar M, Patil I, Waggoner P, Makowski D (2021) performance: An R  
590 Package for Assessment, Comparison and Testing of Statistical Models. J Open Source  
591 Softw 6:3139 <https://joss.theoj.org/papers/10.21105/joss.03139>
- 592 Marshall AT, Clode P (2004) Calcification rate and the effect of temperature in a zooxanthellate  
593 and an azooxanthellate scleractinian reef coral. Coral Reefs 23:218–224
- 594 Marshall PA, Baird AH (2000) Bleaching of corals on the Great Barrier Reef: differential  
595 susceptibilities among taxa. Coral Reefs 19:155–163  
596 <http://link.springer.com/10.1007/s003380000086>
- 597 Matthews JL, Sproles AE, Oakley CA, Grossman AR, Weis VM, Davy SK (2015) Menthol-  
598 induced bleaching rapidly and effectively provides experimental aposymbiotic sea  
599 anemones (*Aiptasia* sp.) for symbiosis investigations. J Exp Biol 219:306–310  
600 <http://jeb.biologists.org/cgi/doi/10.1242/jeb.128934>
- 601 McIlroy SE, Thompson PD, Yuan FL, Bonebrake TC, Baker DM (2019) Subtropical thermal  
602 variation supports persistence of corals but limits productivity of coral reefs. Proc R Soc B  
603 Biol Sci 286:20190882 <https://royalsocietypublishing.org/doi/10.1098/rspb.2019.0882>
- 604 McIlroy SE, Wong JCY, Baker DM (2020) Competitive traits of coral symbionts may alter the  
605 structure and function of the microbiome. ISME J 14:2424–2432  
606 <https://www.nature.com/articles/s41396-020-0697-0>
- 607 McLachlan RH, Price JT, Solomon SL, Grottoli AG (2020) Thirty years of coral heat-stress  
608 experiments: a review of methods. Coral Reefs 39:885–902  
609 <https://link.springer.com/10.1007/s00338-020-01931-9>
- 610 Muscatine L, R. McCloskey L, E. Marian R (1981) Estimating the daily contribution of carbon

- 611 from zooxanthellae to coral animal respiration. *Limnol Oceanogr* 26:601–611  
612 <http://doi.wiley.com/10.4319/lo.1981.26.4.0601>
- 613 Niu W, Huang H, Lin R, Chen C-H, Shen K-N, Hsiao C-D (2016) The complete mitogenome of  
614 the Galaxy Coral, *Galaxea fascicularis* (Cnidaria: Oculinidae). *Mitochondrial DNA Part B*  
615 1:10–11 <https://www.tandfonline.com/doi/full/10.1080/23802359.2015.1137796>
- 616 van Oppen MJH, Oliver JK, Putnam HM, Gates RD (2015) Building coral reef resilience  
617 through assisted evolution. *Proc Natl Acad Sci* 112:2307–2313  
618 <http://www.pnas.org/lookup/doi/10.1073/pnas.1422301112>
- 619 Pavia RTB, Estacion JS (2019) Survival and growth of isolated polyps of *Galaxea fascicularis*  
620 (Linnaeus 1767) on six kinds of culture substrates: implications for mariculture, aquarium  
621 culture, and conservation. *J World Aquac Soc* 50:219–230  
622 <https://onlinelibrary.wiley.com/doi/10.1111/jwas.12538>
- 623 Puntin G, Sweet M, Fraune, Sebastian Medina M, Sharp K, Weis VM, Ziegler M (2022)  
624 Harnessing the power of model organisms to unravel microbial functions in the coral  
625 holobiont. *bioRxiv*
- 626 R Core Team (2021) R: A Language and Environment for Statistical Computing. [https://www.r-](https://www.r-project.org/)  
627 [project.org/ https://www.r-project.org/](https://www.r-project.org/)
- 628 Rades M, Schubert P, Ziegler M, Kröckel M, Reichert J (2022) Building plan for a temperature-  
629 controlled multi-point stirring incubator. [https://www.protocols.io/view/building-plan-for-a-](https://www.protocols.io/view/building-plan-for-a-temperature-controlled-multi-p-dm6gpb34dlzp/v1)  
630 [temperature-controlled-multi-p-dm6gpb34dlzp/v1](https://www.protocols.io/view/building-plan-for-a-temperature-controlled-multi-p-dm6gpb34dlzp/v1)
- 631 Röthig T, Puntin G, Wong JCY, Burian A, McLeod W, Baker DM (2021) Holobiont nitrogen  
632 control and its potential for eutrophication resistance in an obligate photosymbiotic  
633 jellyfish. *Microbiome* 9:127  
634 <https://microbiomejournal.biomedcentral.com/articles/10.1186/s40168-021-01075-0>
- 635 Scharfenstein HJ, Chan WY, Buerger P, Humphrey C, van Oppen MJH (2022) Evidence for de  
636 novo acquisition of microalgal symbionts by bleached adult corals. *ISME J* 16:1676–1679  
637 <https://www.nature.com/articles/s41396-022-01203-0>
- 638 Schneider K, Erez J (2006) The effect of carbonate chemistry on calcification and photosynthesis

- 639 in the hermatypic coral *Acropora eurystoma*. *Limnol Oceanogr* 51:1284–1293  
640 <https://doi.org/10.4319/lo.2006.51.3.1284>
- 641 Schubert P, Wilke T (2018) Coral Microcosms: Challenges and Opportunities for Global Change  
642 Biology. *Corals in a Changing World*. InTech, [http://www.intechopen.com/books/corals-in-](http://www.intechopen.com/books/corals-in-a-changing-world/coral-microcosms-challenges-and-opportunities-for-global-change-biology)  
643 [a-changing-world/coral-microcosms-challenges-and-opportunities-for-global-change-](http://www.intechopen.com/books/corals-in-a-changing-world/coral-microcosms-challenges-and-opportunities-for-global-change-biology)  
644 [biology](http://www.intechopen.com/books/corals-in-a-changing-world/coral-microcosms-challenges-and-opportunities-for-global-change-biology)
- 645 Searle SR, Speed FM, Milliken GA (1980) Population Marginal Means in the Linear Model: An  
646 Alternative to Least Squares Means. *Am Stat* 34:216–221  
647 <http://www.tandfonline.com/doi/abs/10.1080/00031305.1980.10483031>
- 648 Silverstein RN, Cunning R, Baker AC (2015) Change in algal symbiont communities after  
649 bleaching, not prior heat exposure, increases heat tolerance of reef corals. *Glob Chang Biol*  
650 21:236–249 <https://onlinelibrary.wiley.com/doi/10.1111/gcb.12706>
- 651 Tong H, Cai L, Zhou G, Yuan T, Zhang W, Tian R, Huang H, Qian P-Y (2017) Temperature  
652 shapes coral-algal symbiosis in the South China Sea. *Sci Rep* 7:1–12  
653 <http://dx.doi.org/10.1038/srep40118>
- 654 Veron JEN, Stafford-Smith MG, Turak E, DeVantier LM (2016) *Corals of the World*.  
655 [http://www.coralsoftheworld.org/species\\_factsheets/species\\_factsheet\\_summary/galaxea-](http://www.coralsoftheworld.org/species_factsheets/species_factsheet_summary/galaxea-fascicularis/)  
656 [fascicularis/](http://www.coralsoftheworld.org/species_factsheets/species_factsheet_summary/galaxea-fascicularis/)
- 657 Woolstra CR (2013) A journey into the wild of the cnidarian model system *Aiptasia* and its  
658 symbionts. *Mol Ecol* 22:4366–4368
- 659 Wang J-T, Chen Y-Y, Tew KS, Meng P-J, Chen CA (2012) Physiological and biochemical  
660 performances of menthol-induced aposymbiotic corals. *PLoS One* 7:e46406  
661 <https://dx.plos.org/10.1371/journal.pone.0046406>
- 662 Weis VM, Davy SK, Hoegh-Guldberg O, Rodriguez-Lanetty M, Pringle JR (2008) Cell biology  
663 in model systems as the key to understanding corals. *Trends Ecol Evol* 23:369–376  
664 <https://linkinghub.elsevier.com/retrieve/pii/S0169534708001614>
- 665 Wepfer P, Nakajima Y, Hui F, Mitarai S, Economo E (2020a) Metacommunity ecology of  
666 Symbiodiniaceae hosted by the coral *Galaxea fascicularis*. *Mar Ecol Prog Ser* 633:71–87



- 667 <https://www.int-res.com/abstracts/meps/v633/p71-87/>
- 668 Wepfer PH, Nakajima Y, Sutthacheep M, Radice VZ, Richards Z, Ang P, Terraneo T, Sudek M,  
669 Fujimura A, Toonen RJ, Mikheyev AS, Economo EP, Mitarai S (2020b) Evolutionary  
670 biogeography of the reef-building coral genus *Galaxea* across the Indo-Pacific ocean. Mol  
671 Phylogenet Evol 151:106905 <https://doi.org/10.1016/j.ympev.2020.106905>
- 672 Wickham H (2016) Ggplot2: Elegant graphics for data analysis. Springer International  
673 Publishing, Cham, Switzerland <https://books.google.de/books?id=RTMFswEACAAJ>
- 674 Wilkinson SP, Pontasch S, Fisher PL, Davy SK (2016) The distribution of intra-genomically  
675 variable dinoflagellate symbionts at Lord Howe Island, Australia. Coral Reefs 35:565–576  
676 <http://link.springer.com/10.1007/s00338-015-1357-0>
- 677 Zhang Y (2012) Quantitative Trait Loci (QTL). Humana Press, Totowa, NJ  
678 <http://link.springer.com/10.1007/978-1-61779-785-9>
- 679 Zhou G, Cai L, Li Y, Tong H, Jiang L, Zhang Y, Lei X, Guo M, Liu S, Qian P-Y, Huang H  
680 (2017a) Temperature-driven local acclimatization of *Symbiodinium* hosted by the coral  
681 *Galaxea fascicularis* at Hainan Island, China. Front Microbiol 8:1–9  
682 <http://journal.frontiersin.org/article/10.3389/fmicb.2017.02487/full>
- 683 Zhou J, Huang H, Beardall J, Gao K (2017b) Effect of UV radiation on the expulsion of  
684 *Symbiodinium* from the coral *Pocillopora damicornis*. J Photochem Photobiol B Biol  
685 166:12–17 <http://dx.doi.org/10.1016/j.jphotobiol.2016.11.003>
- 686 Ziegler M, Roder C, Büchel C, Voolstra C (2015) Niche acclimatization in Red Sea corals is  
687 dependent on flexibility of host-symbiont association. Mar Ecol Prog Ser 533:149–161  
688 <http://www.int-res.com/abstracts/meps/v533/p149-161/>
