1 **The reef-building coral *Galaxea fascicularis*: a new model system for coral**  
2 **symbiosis research**

3 Giulia Puntin<sup>1</sup>, Jamie Craggs<sup>2,3</sup>, Róisín Hayden<sup>4</sup>, Kara E. Engelhardt<sup>1</sup>, Shelby McIlroy<sup>4</sup>, Michael  
4 Sweet<sup>3,5</sup>, David M. Baker<sup>4</sup>, Maren Ziegler<sup>1,\*</sup>

5 <sup>1</sup>Marine Holobiomics Lab, Department of Animal Ecology & Systematics, Justus Liebig  
6 University Giessen, Heinrich-Buff-Ring 26-32 IFZ, 35392 Giessen, Germany

7 <sup>2</sup>Horniman Museum and Gardens, Forest Hill, London, SE23 3PQ, United Kingdom

8 <sup>3</sup>Coral Spawning Lab, Unit 6, Midas Metro Centre, 193 Garth Rd, Morden, SM4 4NE, United  
9 Kingdom

10 <sup>4</sup>The Swire Institute of Marine Science, University of Hong Kong, Cape D'Aguilar, Hong Kong

11 <sup>5</sup>Aquatic Research Facility, Environmental Sustainability Research Centre, University of Derby,  
12 DE22 1GB, United Kingdom

13 ORCID:

14 GP: 0000-0001-9099-1730

15 JC: 0000-0002-3787-2203

16 SM: 0000-0003-2482-8817

17 MS: 0000-0003-4983-8333

18 DMB: 0000-0002-0308-4954

19 MZ: 0000-0003-2237-9261

20

21 \*Corresponding author: [maren.ziegler@bio.uni-giessen.de](mailto:maren.ziegler@bio.uni-giessen.de)

22 **Abstract**

23 Reef-building corals owe their evolutionary success to their symbiosis with unicellular algae  
24 (Symbiodiniaceae). However, increasingly frequent heat waves lead to coral mass-bleaching  
25 events and pose a serious threat to the survival of reef ecosystems. Despite significant efforts, a  
26 mechanistic understanding of coral-algal symbiosis functioning, what leads to its breakdown and  
27 what can prevent it, remains incomplete. The main obstacles are low amenability of corals to  
28 experimental handling and, owing to its obligatory nature, the difficulties of manipulating the  
29 coral-algal association. Indeed, many studies on the symbiotic partnership are conducted on other  
30 cnidarian model organisms and their results may therefore not be fully transferable to tropical reef-  
31 building corals. Here, we identify the tropical stony coral species *Galaxea fascicularis* as a novel  
32 candidate coral model system. Individual polyps of this species can be separated, enabling highly  
33 replicated genotype studies, and are well suited to experimental investigation of the symbiosis as  
34 they can be easily and effectively rid of their algal symbionts (bleached). We show that bleached  
35 adult individuals can reestablish symbiosis with non-native symbionts, and we report the  
36 completion of the gametogenic cycle *ex-situ*, with the successful spawning in aquaria over multiple  
37 years. These achievements help overcome several of the major limitations to direct research on  
38 corals and highlight the potential of *G. fascicularis* as an important new model system for  
39 investigations of symbiosis functioning and manipulation.

40

41 **Keywords:** Model organisms; reef-building corals; menthol bleaching; symbiosis manipulation;  
42 *ex situ* sexual reproduction

43

## 44 **Introduction**

45 Reef-building corals form obligatory endosymbiotic association with unicellular algae of the  
46 family Symbiodiniaceae. This association is key to their evolutionary success, but it is also at the  
47 heart of corals' susceptibility to global climate change, which manifests in coral bleaching - the  
48 breakdown of the coral-algal symbiosis (Hoegh-Guldberg 1999). Bleaching is mostly driven by  
49 marine heatwaves which are predicted to worsen, causing the loss of virtually all coral reefs by the  
50 end of this century (van Hooidonk et al. 2016).

51 The interaction between heat stress and bleaching has been studied for more than 30 years (Gates  
52 et al. 1992; McLachlan et al. 2020), but a detailed understanding of the mechanisms underlying  
53 coral bleaching is still missing. Progress in coral symbiosis research is hampered by two main  
54 aspects. First, corals are challenging to maintain in aquarium settings as they tolerate only a narrow  
55 range of environmental conditions, i.e., bleaching can be triggered by just 1-2 °C increases above  
56 summer mean temperatures (Glynn and D'Croze 1990). Second, the obligatory nature of the coral-  
57 algal association makes it particularly challenging to physically and functionally separate the  
58 partners, an approach often necessary to unravel the mechanisms underlying symbiosis breakdown  
59 and what could prevent it (Weis et al. 2008; Voolstra 2013).

60 Model organisms are integral for understanding fundamental biological principles and symbiotic  
61 cnidarians have successfully been used as “coral models”, advancing our understanding of coral  
62 bleaching and holobiont functioning (Weis et al. 2008). These model organisms share important  
63 traits with corals, such as being cnidarians that associate with microalgae, yet they also lack other  
64 features that normally represent obstacles to research work such as the calcium carbonate skeleton.  
65 In addition, the ability to study the animal host and its algal symbiont in isolation is more easily  
66 achieved with facultatively symbiotic organisms such as *Hydra* spp., *Aiptasia* (*Exaiptasia*

67 *diaphana*), and *Astrangia poculata* (Dimond and Carrington 2007; Weis et al. 2008; Galliot 2012).  
68 Cnidarian model organisms allow the study of basal or shared traits or phenomena at a speed that  
69 would not be possible with reef-building corals, but testing on the latter remains necessary for the  
70 understanding of coral-specific or ecologically relevant aspects. The obligatory symbiosis with  
71 Symbiodiniaceae in reef-building corals has important biological implications (Falkowski et al.  
72 1984; Hoegh-Guldberg 1999), similar to the calcification process that is deeply intertwined with  
73 coral physiology and ecology (Gattuso et al. 1999). It is therefore important to establish a “true”  
74 tropical reef-building coral model species.

75 The richness of the scleractinian taxon offers a vast array of species to choose from in the quest  
76 for a suitable candidate coral model species. These can be evaluated for their tractability (as  
77 amenability to experimental work) considering several aspects which, as proposed by Puntin et al.  
78 (2022) should include: 1) pre-existing knowledge: baseline information of the organism’s biology  
79 is necessary to interpret and contextualize results; 2) compatibility with aquarium rearing: the  
80 possibility to maintain the organism and preferably to complete its life cycle in the lab is essential  
81 to increase its availability, reduce confounding effects such as unknown life history, improve  
82 reproducibility, and lower the pressure on threatened wild populations; 3) amenability to symbiosis  
83 manipulations is necessary to help unravel complex coral-algal functional interactions, and can be  
84 broken down into the organism’s suitability to be rendered aposymbiotic (bleached), to be  
85 maintained aposymbiotic for a certain time, and to then be re-infected with Symbiodiniaceae.

86 We have identified the coral species *Galaxea fascicularis* (Linnaeus, 1767) (clade: Complexa,  
87 family: Euphyllidae) as a promising candidate coral model system. The species is relatively  
88 common across the Indo-Pacific region (Veron et al. 2016), where the phylogeny of the genus  
89 *Galaxea* is geographically well resolved (Wepfer et al. 2020b). It is also one of the more commonly

90 used species in heat-stress experiments (McLachlan et al. 2020) and in studies on coral  
91 calcification (e.g., Marshall and Clode 2004; Al-Horani 2005). Importantly, other community  
92 resources such as an annotated draft genome are available (Liew et al. 2016; Niu et al. 2016,  
93 <http://www.gfas.reefgenomics.org/>). In addition, *G. fascicularis* is known for its tolerance to  
94 stressors as it is “largely unaffected by bleaching” in the field (Marshall and Baird 2000) and for  
95 being easy to grow and propagate in aquaria (Pavia and Estacion 2019). Further, its morphology  
96 provides additional practical advantages with relatively big polyps, which can be easily isolated  
97 (Pavia and Estacion 2019). This conveniently allows reduction of the complexity of the organism  
98 from colonial to individual, enables high clonal replication, and facilitates visualization (Al-Horani  
99 et al. 2003; Marshall and Clode 2004). Its association with Symbiodiniaceae is relatively well  
100 characterized (Huang et al. 2011; Wepfer et al. 2020a). Furthermore, the species’ reproductive  
101 mode and spawning patterns in the wild are well documented (Babcock et al. 1986; Harrison 1988;  
102 Keshavmurthy et al. 2012). However, its amenability to symbiosis manipulation, to experimental  
103 handling of bleached individuals, and the ability to complete gametogenic cycles and spawning in  
104 closed aquaria have not yet been described.

105 The overarching aim of this study was to explore the potential of *Galaxea fascicularis* as a coral  
106 laboratory model. Specifically, we investigated: 1) the feasibility to render polyps aposymbiotic  
107 by eliminating Symbiodiniaceae (bleaching), 2) the amenability to experimental manipulation of  
108 symbiotic and aposymbiotic polyps in a simplified system, 3) the re-establishment of the symbiosis  
109 with different species of Symbiodiniaceae, and 4) the possibility to induce full gametogenic cycles  
110 *ex situ*, with subsequent spawning under aquarium conditions. These aspects are central to  
111 overcoming the two main obstacles to coral research work: low tractability of corals and their  
112 complex nature.

## 113 **Materials and methods**

### 114 **Coral collection and long-term aquarium rearing**

115 Colonies of *Galaxea fascicularis* were collected from three geographical locations: the Red Sea,  
116 Hong Kong, and the Great Barrier Reef (Fig. 1). To increase comparability, rearing conditions  
117 were adjusted to be similar between labs, with few exceptions pertaining to the particular  
118 experimental needs or feeding regime, which was based on the long-term rearing arrangements in  
119 each facility (Tab. S1). Red Sea colonies were collected at 9-13 m depth at the North-Eastern  
120 protected end of the reef “Al Fahal” in the central Saudi Arabian Red Sea (22.3054°, 38.9655°) in  
121 March 2019, and transported to the Ocean2100 aquarium facility at Justus Liebig University  
122 Giessen (Germany) where they are part of the live collection (CITES permit 19-SA-000096-PD).  
123 In the aquarium system, light was provided by white and blue fluorescent lamps with a light:dark  
124 cycle of 12:12 h at 130 -160  $\mu\text{mol photons m}^{-2} \text{s}^{-1}$ , which approximates light condition at the  
125 collection site (Ziegler et al. 2015). Salinity was maintained around 35 and temperature at 26 °C.  
126 Colonies were fed daily with a combination of frozen copepods, *Artemia*, krill, and *Mysis*.  
127 Hong Kong colonies were collected from 5 m (max. depth) from Crescent Island (22.5308°,  
128 114.3150°) in November 2020 and transported to the University of Hong Kong, where they were  
129 fragmented and acclimated to aquarium conditions for one month. The aquarium system consisted  
130 of 6-L acrylic tanks placed within a Plant Growth Chamber (Panasonic MLR-352H-PA). Each  
131 tank held eight ~3 cm-fragments and was fitted with a submersible pump (Atman AT301) and a  
132 small water filter (Shiruba PF120). The fragments used in symbiosis reestablishment were fed  
133 twice-weekly with a powdered blend of marine plankton (ReefRoids, Polyp Lab) followed by a  
134 partial water change. Light, salinity, and temperature conditions were consistent with those  
135 maintained in the Ocean2100 facility.

136 For *ex situ* spawning, 35 colonies ( $10.1 \text{ cm} \pm 2.5$  (mean  $\pm$  sd)) were collected from Arlington Reef,  
137 Great Barrier Reef, Australia ( $-16.7000^\circ$ ,  $146.0500^\circ$ ) in September 2019, and transported to the  
138 Horniman Museum and Gardens (United Kingdom; CITES permit 585319/01) with the ‘inverted  
139 submersion method’ as described by Craggs et al. (2018). Colonies were distributed into four coral  
140 spawning systems ([www.coralspawninglab.org](http://www.coralspawninglab.org)) that replicated the natural environmental  
141 parameters (seasonal temperature, photoperiod, solar irradiance, and lunar cycle) required to  
142 stimulate reproduction (Tab. S1). Aquarium design and coral husbandry protocol was based on the  
143 mesocosms described by Craggs et al. (2017), and the seasonal temperature profile were based on  
144 a non-sequential eight year average (1998 - 2017) from Moore Reef ( $-16.8667^\circ$ ,  $146.2334^\circ$ )  
145 (<http://data.aims.gov.au/aimsrtids/datatool.xhtml?site=931&param=water%20temperature>) (Fig.  
146 S7). Colonies were fed daily on a mix of phytoplankton (*Tisochrysis lutea*, *Chaetoceros calitrans*  
147 and *Rhodomonas salina*) and zooplankton (newly hatched *Artemia salina* nauplii, frozen red  
148 plankton, rotifers, and lobster / fish eggs) (Tab. S1). During feeding the broodstock tank was  
149 isolated from the filtration for two hours to aid prey capture and uptake.

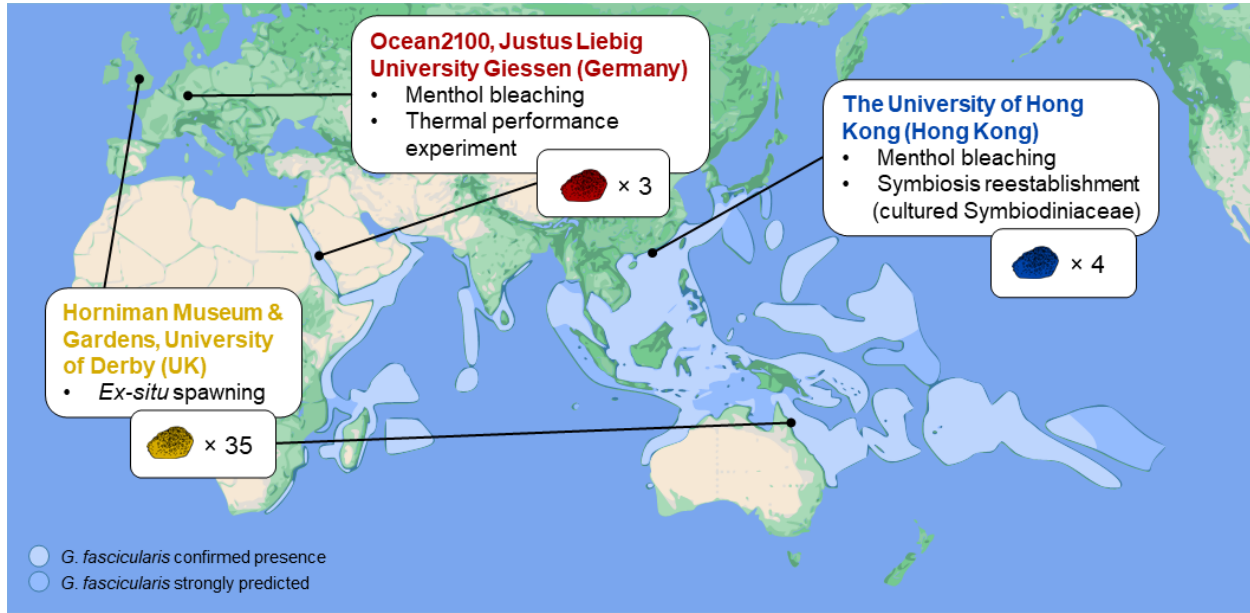

150

151 **Fig. 1 Summary of *G. fascicularis* colony origins, participating labs, and experiments**  
152 **described in this study.** Colonies were collected from three distant locations (Red Sea, Hong  
153 Kong, and the Great Barrier Reef) and separately employed in different experiments (menthol  
154 bleaching, thermal performance, symbiosis reestablishment, and *ex situ* spawning). Map modified  
155 from Corals of the World ([www.coralsoftheworld.org](http://www.coralsoftheworld.org), Veron et al. (2016)).

156

## 157 **Thermal performance experiment on single polyps**

### 158 ***Preparation of single polyps***

159 For the menthol bleaching and thermal performance experiment, we used single polyps from three  
160 Red Sea colonies each showing distinct coloration (Fig. S1). Replicate clonal polyps were isolated  
161 from each colony using an electric rotary cutter, mounted on coral glue (Grotech, CoraFix  
162 SuperFast), and allowed to heal for two weeks in the Ocean2100 aquarium facility (Schubert and  
163 Wilke 2018).



164 ***Menthol bleaching to remove algal symbionts***

165 An equal number of polyps from each colony were randomly assigned to the control group  
166 (maintained in a symbiotic state), and the bleached group (chemically bleached with menthol).  
167 Menthol bleaching followed a protocol modified from Wang et al. (2012) and consisted of three  
168 days of treatment in 0.38 mM menthol solution in seawater, followed by a day of rest and a fourth  
169 day of menthol treatment. Each day the polyps were incubated in menthol for 8 h under light and  
170 stirring (Fig. S2). After, the polyps were rinsed and kept in clean containers with air bubbling and  
171 stirring. During menthol treatment, the treated polyps were only exposed to filtered (1.2 µm)  
172 artificial seawater (FASW) to prevent exposure to Symbiodiniaceae. Following, all polyps  
173 (including, for consistency, the symbiotic group) were maintained in FASW.

174 To confirm bleaching, half of the polyps from each group (bleached and symbiotic) and each  
175 colony were visually assessed with a fluorescence stereomicroscope (Leica MZ16 F) 10 days after  
176 the termination of the menthol treatment. Representative pictures were taken under natural light  
177 (brightfield, light source: 2950 K) and under UV light with GF2 filters allowing visualization of  
178 the green fluorescent proteins and chlorophyll (Fig. 2a). Following the same bleaching protocol,  
179 menthol-bleached polyps were also documented using a compound epifluorescence microscope to  
180 reach higher resolution (Leica DM 5500B, TX2 filter) (Fig. 2b).

181 ***Thermal performance experimental design***

182 Symbiotic and bleached polyps were moved to the experimental tanks on the day after the last  
183 menthol exposure and allowed to recover and acclimate for 10 days. The experimental system  
184 consisted of eight 5-L glass tanks (20 cm × 30 cm) equipped with a small pump (Resun SP-500)  
185 in a common temperature-controlled water bath (26 °C). White fluorescent lamps were used to  
186 maintain the light cycle and intensity consistent with long-term rearing conditions. Bleached and

187 symbiotic polyps were kept in separate tanks, with four replicate tanks per treatment filled with  
188 FASW. Each tank contained one polyp from each colony ( $n = 3$ ) that were used for the thermal  
189 performance experiment. Additional polyps were kept in each tank as back-up (Fig. S3). Polyps  
190 were fed each day after the end of the dark incubation, followed by 10 % water change after 2-3  
191 h. Each polyp was fed one small frozen adult *Artemia* pipetted directly on top of the oral opening.  
192 The polyps were cleaned every two to three days after the incubations to remove fouling that would  
193 interfere with respirometry measurements.

194 To test the amenability to experimental handling of single polyps and to compare metabolic rates  
195 of bleached and symbiotic polyps, we conducted a thermal performance experiment.  
196 Photosynthesis and respiration of *G. fascicularis* polyps were measured across a 12 °C temperature  
197 range over 10 days. For this, the polyps were acclimated to a different temperature each day, in  
198 the following order: 20, 22, 23, 24, 25, 26, 27, 28, 30 to 32 °C. The temperature of the water bath  
199 was changed overnight, and incubations took place the subsequent day at the respective  
200 temperature.

### 201 ***Photosynthesis and respiration of symbiotic and bleached polyps***

202 We measured oxygen evolution of individual *G. fascicularis* polyps in light and dark incubations  
203 to calculate net photosynthesis (PN) and dark respiration (R) respectively. For these measurements  
204 four bleached and four symbiotic polyps from three colonies were used ( $n = 12$ ). Every day, each  
205 polyp was placed in individual 160 mL glass incubation jars (Weck, Germany), equipped with a  
206 magnetic stirrer ( $\sim 5 \text{ cm s}^{-1}$ ). Three additional jars containing only seawater and stirring bars were  
207 used to control background biological activity. Light intensity of 230 - 280  $\mu\text{mol photons m}^{-2} \text{ s}^{-1}$   
208 during light incubations (ATI 80W Aquablue Special) and temperatures were maintained through

209 thermostat-controlled water baths placed on a custom-made multiplate stirring system (Rades et  
210 al. 2022).

211 Dissolved oxygen (DO) was measured at the start and at the end of each incubation using a  
212 handheld multiparameter probe (WTW Multi 3620 IDS set). Light incubations lasted 2 h around  
213 mid-day followed by 1.5 h of dark incubation. Net photosynthesis and respiration were calculated  
214 using the following formula (Schneider and Erez 2006):

$$215 \quad PN \text{ or } R [mgO_2 \times cm^{-2} \times h^{-1}] = \frac{\Delta O_2 [mg \times L^{-1}] \times V_{incubation} [L]}{T [h] \times SA [cm^2]}$$

216 Where  $\Delta O_2$  is the difference in dissolved oxygen between the end and the start of the incubation  
217 ( $DO_{end} - DO_{start}$ ) corrected for the controls'  $\Delta O_2$ . This is multiplied by the volume of the incubation  
218 chambers in L ( $V_{incubation}$ ), and divided by incubation time (T) in hours and polyp surface area (SA)  
219 in  $cm^2$ .

### 220 ***Surface area measurements***

221 Polyp surface area was measured through photogrammetry. Between 40 to 50 pictures of each  
222 polyp were taken with a phone camera two days before the beginning of the incubations. These  
223 were used to create 3D models with 3DF Zephyr Free (v.4.523), cleaned on Artec3D (Studio 11  
224 Professional v.11.2.2.16), and loaded on MeshLab (v.2016.12, Cignoni et al. 2008) for size scaling  
225 and calculation of live coral surface area.

### 226 ***Thermal performance data analysis***

227 All analyses were conducted in the R statistical environment (v.4.1.0, R Core Team 2021) and  
228 plotted with ggplot2 (v.3.3.5, Wickham 2016). The effects of symbiotic state ('symbiotic' vs.  
229 'bleached') or colony identity on net photosynthesis (PN) and respiration (R) were analyzed using  
230 linear mixed-effect models considering light and dark incubations separately. For this, 'symbiotic

231 state', 'colony identity', and 'temperature' were set as fixed factors, and 'polyp identity' as random  
232 factor. The package 'lmerTest' (v.3.1-3, Kuznetsova et al. 2017) was used to construct the models  
233 and calculate p-values. The package 'performance' was used to check the residuals and to compare  
234 alternative models (v.0.7.3, Lüdtke et al. 2021). Differences between colonies were tested as  
235 pairwise comparisons of estimated marginal means (Searle et al. 1980) with Bonferroni correction  
236 with the 'emmeans' package (v.1.6.2-1).

### 237 **Symbiosis reestablishment after menthol bleaching**

#### 238 *Native Symbiodiniaceae characterization*

239 *G. fascicularis* colonies were collected in March 2019 from Crescent Bay in Hong Kong. DNA  
240 was successfully extracted from two colonies using the Qiagen DNeasy 96 Blood & Tissue kit.  
241 The ITS2 marker region was amplified with the primers SYM\_VAR\_5.8S2 and SYM\_VAR  
242 following the PCR protocol by Hume et al. (2018), followed by paired-end sequencing on the  
243 Illumina MiSeq platform (2 × 300 bp). Raw sequencing data was analyzed using the SymPortal  
244 workflow remote instance (Hume et al. 2019), with results reported as post-MED ITS2 sequences  
245 in relative abundances.

#### 246 *Menthol bleaching and inoculation of cultured Symbiodiniaceae*

247 We explored the possibility of returning adult corals to the symbiotic state after menthol bleaching.  
248 For this, we inoculated menthol-bleached coral fragments from Hong Kong with cultured  
249 Symbiodiniaceae. Bleaching followed the same protocol described for the Red Sea colonies. Two  
250 species of symbionts, *Cladocopium goreau* and *Durusdinium trenchii* were chosen for targeted  
251 exposure of the bleached fragments, as species from both of these genera are known to form stable  
252 symbiosis with *G. fascicularis* across the South China Sea (Tong et al. 2017). Batch cultures of *C.*  
253 *goreau* (AIMS-SCF-055, ITS2 type-sequence C1, isolated from *Acropora tenuis*) and *D. trenchii*

254 (AIMS-SCF-088, ITS2 type-sequence D1-4, isolated from *A. muricata*) were obtained from the  
255 Symbiont Culture Facility at the Australian Institute of Marine Science and maintained in f/2  
256 media (Guillard 1975) under the same conditions as the corals. A total of 16 fragments were  
257 inoculated with a concentration of 200 symbiont cells ml<sup>-1</sup> in each 6-L aquarium. The  
258 concentration of symbionts was divided in a 90:10 ratio (180 cells ml<sup>-1</sup> *D. trenchii* : 20 cells ml<sup>-1</sup>  
259 *C. goreau*). This ratio was chosen because members of *Cladocopium* are the most prevalent  
260 symbionts found in *G. fascicularis* in Hong Kong (Huang et al. 2011; Tong et al. 2017) and across  
261 its wide geographic range from the Red Sea to the South China Sea, where *Durusdinium* is only  
262 occasionally found and only in comparably warm habitats (Dong et al. 2009; Ziegler et al. 2017;  
263 Zhou et al. 2017). The symbiont aliquots were centrifuged to remove the culture media and washed  
264 once with FASW before final resuspension in 10 mL FASW. The bleached fragments were first  
265 fed before being exposed to the chosen symbionts. For this, a suspension of ReefRoids in ASW  
266 was pipetted directly into the oral opening of each polyp. The same process was then immediately  
267 repeated with the suspended symbionts. Aquarium filters were turned off for 1 h to allow the corals  
268 to feed and to prevent removal of symbiont cells from the water column. Fragments were  
269 inoculated twice a week for 6 weeks, until symbiosis reestablishment was visually confirmed.  
270 Symbiodiniaceae populations *in hospite* were then characterized with fluorescent in-situ  
271 hybridization (FISH) and flow cytometry (McIlroy et al. 2020).

### 272 ***Fluorescent In-Situ Hybridisation (FISH)***

273 After 6 weeks of inoculation, a single polyp was removed from each fragment with a chisel. Tissue  
274 was removed from the skeleton with an airbrush containing deionized water. The resulting slurry  
275 was homogenized using a 20- $\mu$ l pipette tip. 1.5 mL of homogenate was transferred to a 2-mL  
276 Eppendorf tube and centrifuged at 500 rpm for seven minutes, after which the supernatant was

277 discarded. The remaining pellet was washed once before being preserved in 5X SET buffer and  
278 stored at -80 °C for further analysis.

279 Samples were prepared following an adapted protocol from McIlroy et al. (2020). Briefly, after  
280 washing with 5X SET in IGEPAL at 0.4 and 0.1 % vol/vol samples were split equally between  
281 three 1.5-mL black Eppendorf tubes. Each sample had one tube treated with a SymC probe, one  
282 tube with a SymD probe and one without any probe as a control. Both SymC (5'-  
283 CTACCCAAGAAGACTTGCAGG-3') and SymD (5'-CCACCCAAGAAGACTCGCGTG-3') probes  
284 were designed to have genus-level specificity for *Cladocopium* and *Durusdinium*, respectively,  
285 and were labelled at 5' end with Alexa Fluor ® 532. After overnight hybridization at 45 °C (5X  
286 SET, 0.1 % vol/vol IGE- PAL, 10 % vol/vol formamide and 100 pmol of the relevant probe),  
287 samples were washed once in warm 1X SET, vortexed and resuspended in 500 µl of 1X SET for  
288 same-day cytometric analysis on a BD FACSAria Fusion flow cytometer (BD Biosciences, CA).  
289 A gating hierarchy was used to isolate cells of interest. Cells were screened for size and presence  
290 of doublets (multiple cells stuck together) based on light-scatter parameters (forward-scatter (FSC)  
291 and side-scatter (SSC) (Fig. S6a-c). Probe-positive cells were then distinguished based on their  
292 position within the 582m vs SSC-A scatterplot (Fig. S6d,e). FlowJo™ Software (v.10.8.1, BD Life  
293 Sciences) was used to determine the percentage of probe-positive cells (either *Cladocopium* or  
294 *Durusdinium*), to identify the presence and the relative abundance of each algal genus within the  
295 sample.

### 296 **Completing gametogenic cycles and *ex-situ* spawning**

297 *Galaxea fascicularis* in the GBR spawns between October and December, 0.05-200 minutes after  
298 sunset (MAS) and 1 – 8 nights after full moon (NAFM) (Babcock et al. 1986; Baird et al. 2021).

299 To determine if the *ex situ* reproductive pattern remained in synchrony with the wild we followed  
300 our colonies over three consecutive reproductive seasons (2019 – 2021).

301 To ascertain gamete development in each colony, two months prior to predicted spawning, and  
302 two to four days prior to the full moon, whole polyps were removed from each colony and  
303 longitudinal sections imaged (Canon 5d MKIII, Fig. 5a,d). Based on the stage of gamete  
304 development in these sections *ex situ* spawning activity was predicted.

305 To record spawning observations each year, colonies were observed with red head torches during  
306 the predicted spawning months. Observations commenced two NAFM and 30 mins prior to the  
307 predicted spawning time, during which time the broodstock aquariums were isolated from the  
308 filtration system. In addition, all internal water pumps were also turned off leaving the aquariums'  
309 water static. Observations continued over multiple consecutive nights until all colonies that had  
310 developed gametes, during that reproductive season, spawned. Spawning date and time of each  
311 colony was recorded, with onset of spawning being denoted as the time of first gamete release.  
312 Following release, gametes were pooled to allow fertilization to occur, and subsequent embryos  
313 were reared and larvae settled following the method described by Craggs et al. (2019).

## 314 **Results**

### 315 **Production and long-term rearing of bleached polyps**

316 We produced single polyps (clonal replicates) of *G. fascicularis* colonies from the Red Sea and  
317 bleached them with menthol. All polyps (n = 24, including additional polyps not used in this  
318 experiment) survived the menthol treatment and appeared visually completely white. Similarly, all  
319 menthol-bleached coral fragments from Hong Kong (n = 16) survived the treatment. Visual  
320 inspection under a fluorescent stereomicroscope revealed no detectable algal cells in the bleached  
321 polyps (Red Sea colonies, Fig. 2a), but inspection at higher magnification (compound fluorescent

322 microscope,  $\times 400$ ) revealed the presence of few scattered algal cells, limited to the base of the  
323 tentacles (Fig. 2b).

324 All polyps that were employed in the thermal performance experiment ( $n = 12$ ) remained visually  
325 completely bleached and viable throughout the 10 days of temperature treatment, with the  
326 exception of two polyps that appeared dead on the 7<sup>th</sup> and 8<sup>th</sup> day of incubation, respectively. These  
327 polyps showed atrophic and unresponsive tentacles, and overall thinning of the soft tissue until it  
328 was not recognizable. Overall, we successfully maintained the bleached polyps for three weeks  
329 from the termination of the menthol treatment.

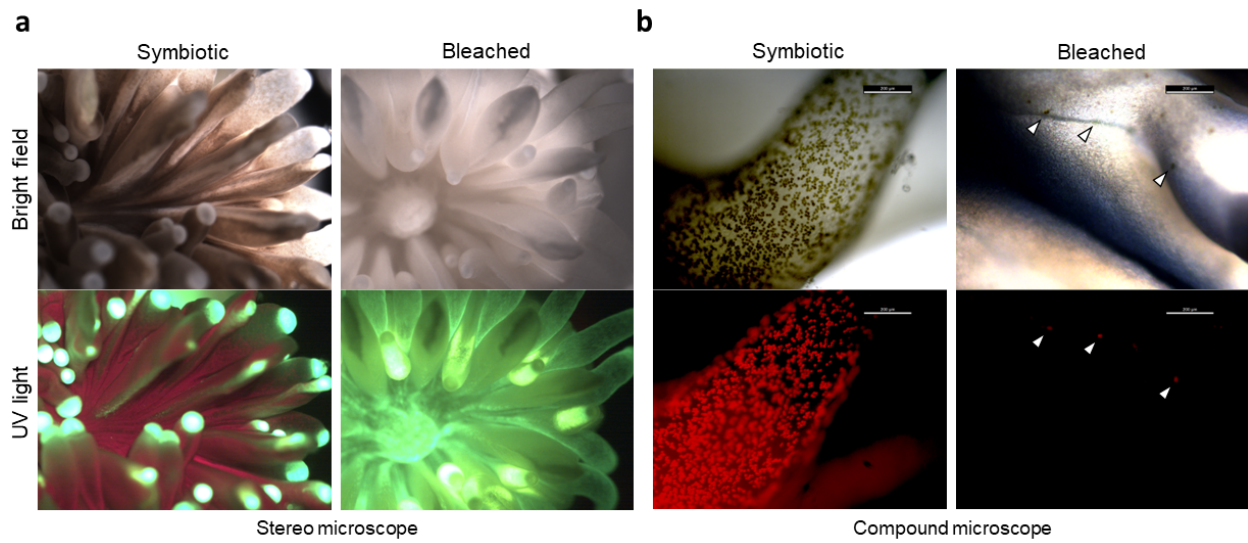

330  
331 **Fig. 2 Microscopic comparison between symbiotic and menthol-bleached polyps.**  
332 Representative stereo and compound micrographs in bright field and UV light, with filters for  
333 chlorophyll (red) and coral tissue (green) autofluorescence. **a** Symbiodiniaceae cells are abundant  
334 in symbiotic polyps while not detectable in bleached polyps. **b** At higher magnifications, few algal  
335 cells are still detectable in bleached polyps only at the base of the tentacles (arrows).



336 **Amenability to experimental manipulation and broad thermal tolerance**

337 Symbiotic (untreated) polyps had positive net photosynthesis across all temperatures from 21 to  
338 32 °C (Fig. 3). Net photosynthesis peaked at 23 °C (mean 13.05  $\mu\text{g O}_2 \text{ cm}^{-2} \text{ h}^{-1}$ ) and reached the  
339 minimum at 32 °C (mean 3.26  $\mu\text{g O}_2 \text{ cm}^{-2} \text{ h}^{-1}$ ). In contrast, respiration overall increased with  
340 temperature with minimum values at 21 °C (mean 5.77  $\mu\text{g O}_2 \text{ cm}^{-2} \text{ h}^{-1}$ ) and maximum at 32 °C  
341 (mean 25.70  $\mu\text{g O}_2 \text{ cm}^{-2} \text{ h}^{-1}$ ; Fig. 3). Bleached polyps, as expected by their lack of photosymbionts,  
342 exhibited a net oxygen depletion. Similar to symbiotic polyps, respiration in bleached polyps  
343 increased with temperature, both in light and dark incubations (Fig. 3). Overall, respiration in  
344 symbiotic polyps was higher than in bleached polyps ( $P_{\text{lmer}} < 0.0001$ ).

345 While net photosynthesis was similar between colonies ( $P_{\text{lmer}} > 0.05$ ), respiration was significantly  
346 higher in one colony ( $P_{\text{lmer}} < 0.001$ ) compared to the other two (RS2-RS1:  $P_{\text{Bonf}} < 0.01$ ; RS2-RS3:  
347  $P_{\text{Bonf}} < 0.01$ ; RS1-RS3:  $P_{\text{Bonf}} > 0.05$ ; Fig. S4).

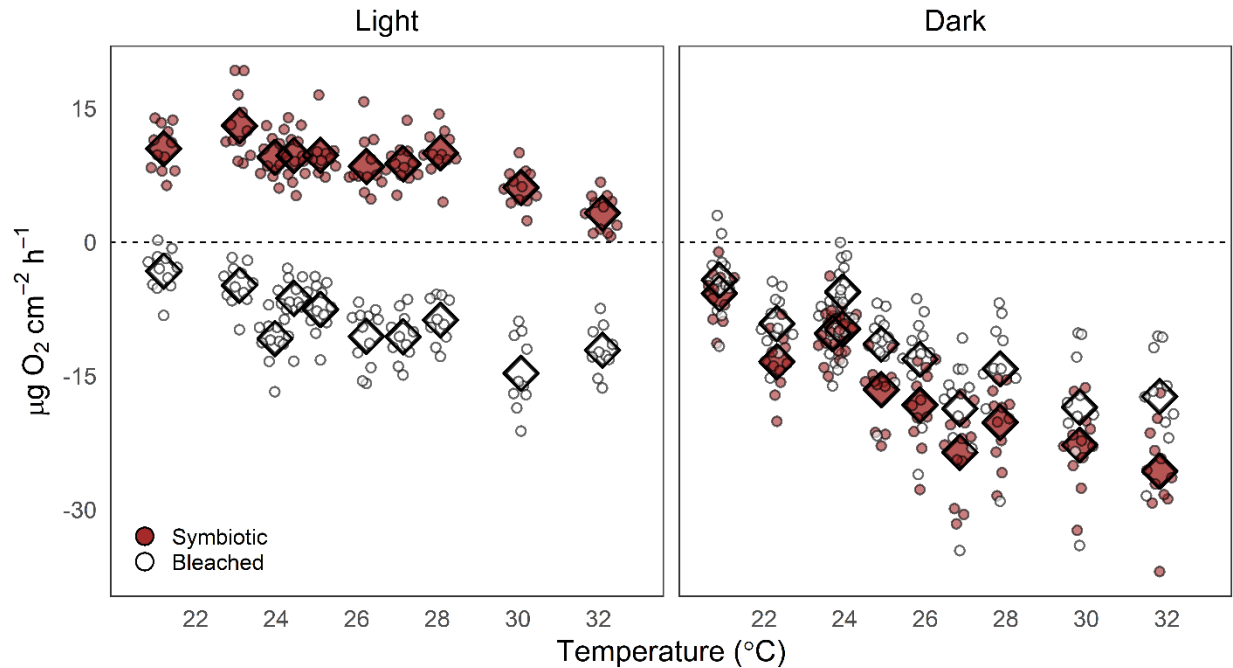

348

349 **Fig. 3 Net photosynthesis and respiration rate of symbiotic states in *Galaxea fascicularis*.**

350 Symbiotic (brown symbols) and bleached (white symbols) polyps in light and dark incubations.

351 Noise added (jittering) for ease of visualization, means per group depicted as diamonds. n = 12

### 352 **Symbiosis re-establishment after bleaching**

353 Inoculation with cultured symbionts resulted in successful symbiosis re-establishment for 100 %

354 of the samples (n = 16), which were macroscopically visibly symbiotic. Of these, nine samples

355 were successfully FISH hybridized, with the genus-specific probes identifying the presence of both

356 target genera in each sample. Individual variation in the relative ratio of each genus was evident

357 among the fragments, with *Durusdinium* contributing to 4 – 63 % of cells and *Cladocopium* to 37

358 – 82 % (Fig. 4, Tab. S2). A small, but significant proportion of symbionts remained unlabeled in

359 some samples. These may represent additional symbiont genera or be the result of variable probe

360 efficiency. *G. fascicularis* colonies from the same location were found to harbor *Cladocopium*

361 symbionts only (dominant ITS2 sequence types: C1 and C1c, Tab. S3).

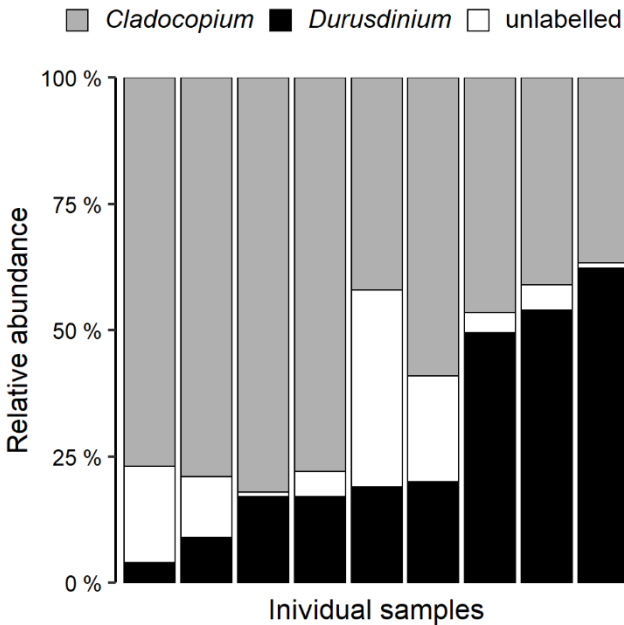

362

363 **Fig. 4 Symbiosis reestablishment in menthol-bleached adult corals inoculated with cultured**  
364 **Symbiodiniaceae of the genera *Cladocopium* and *Durusdinium*.** The presence and relative  
365 abundance (%) of both genera was confirmed and quantified through fluorescent in-situ  
366 hybridization (FISH) and flow cytometry.

#### 367 **Ex-situ spawning**

368 Spawning was monitored each year over the three-year observation period for all 35 colonies.  
369 Annual fecundity, as a percentage of colonies completing a full gametogenic cycle, was on average  
370 56.2 % during these three spawning cycles (2019: 48.6 %, 2020: 45.7 %, and 2021: 74.3 %).

371

372 Spawning occurred in synchrony with wild predictions, with gametes being released between  
373 October and January each year, between 5 - 259 MAS and 4 - 13 NAFM (Fig. 5b-c & e-f, Fig. 6).  
374 Following embryo rearing, Symbiodiniaceae were observed within primary polyps 14 days post  
375 settlement (Fig. 5g). These originated from the adult colonies housed in the same system and taken

376 up via the water column. Polyps were fully developed 40 days post settlement (Fig. 5h) and grew  
377 into small colonies within the first six months (Fig. 5i).

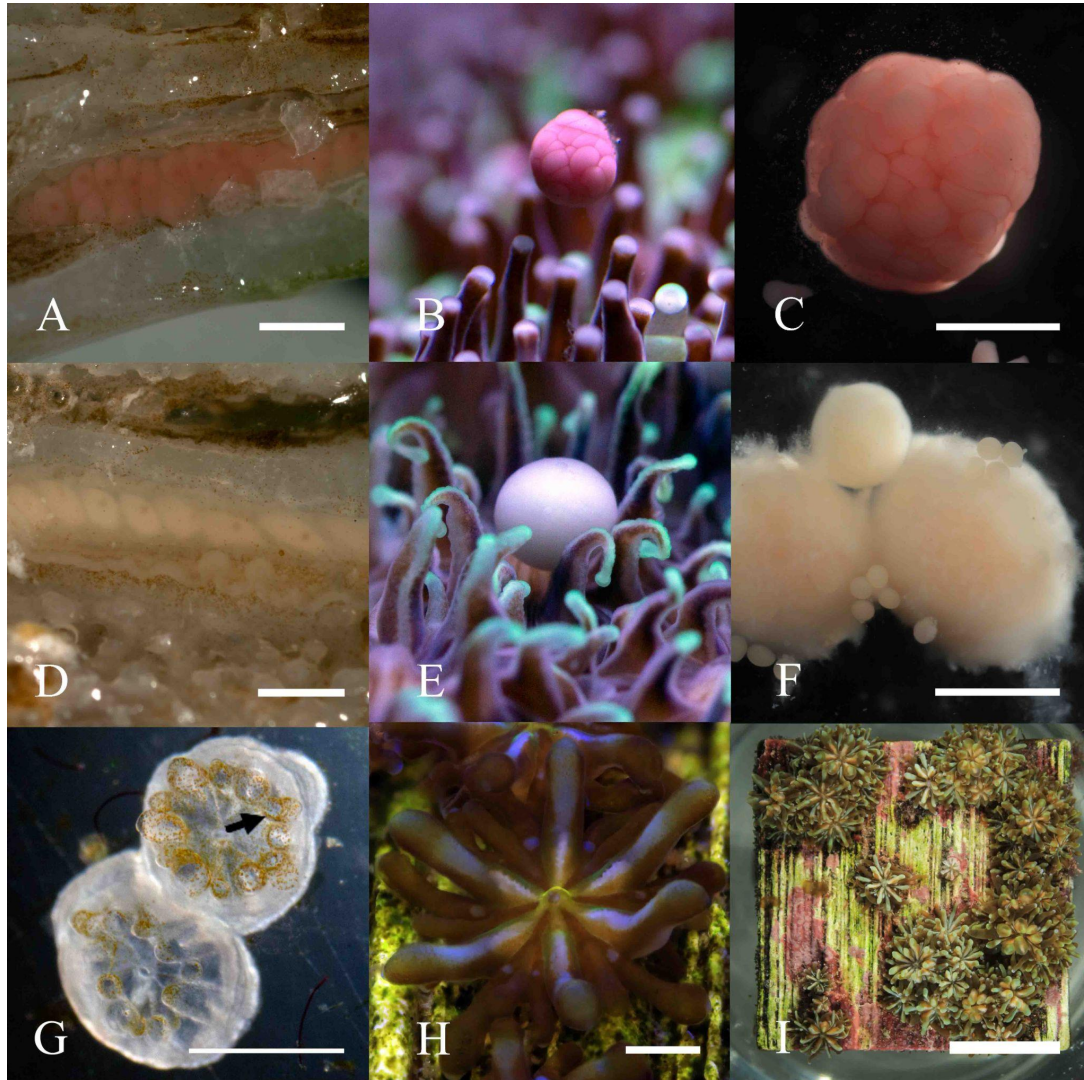

378

379

380

381

382

383

384

385

386

**Fig. 5 Representative images of female and male colonies of *Galaxea fascicularis* spawning *ex situ* and gamete development.** **a** Longitudinal section of female polyp with pinkish-red pigmented oocytes. **b** Female colony releasing oocyte bundle *ex situ*. **c** Close-up of female bundle post release. **d** Longitudinal section of male polyp with white oocytes. **e** Male colony releasing oocytes/sperm bundle *ex situ*. **f** Close-up of male gamete bundles post release undergoing disassociation. **g** Newly settled *G. fascicularis* primary polyps showing initial Symbiodiniaceae (arrow) uptake 14 days post settlement. **h** Primary polyp 40 days post settlement. **i** Multiple colonies six months post settlement. Scale bar: a-h = 1 mm, i = 1 cm.

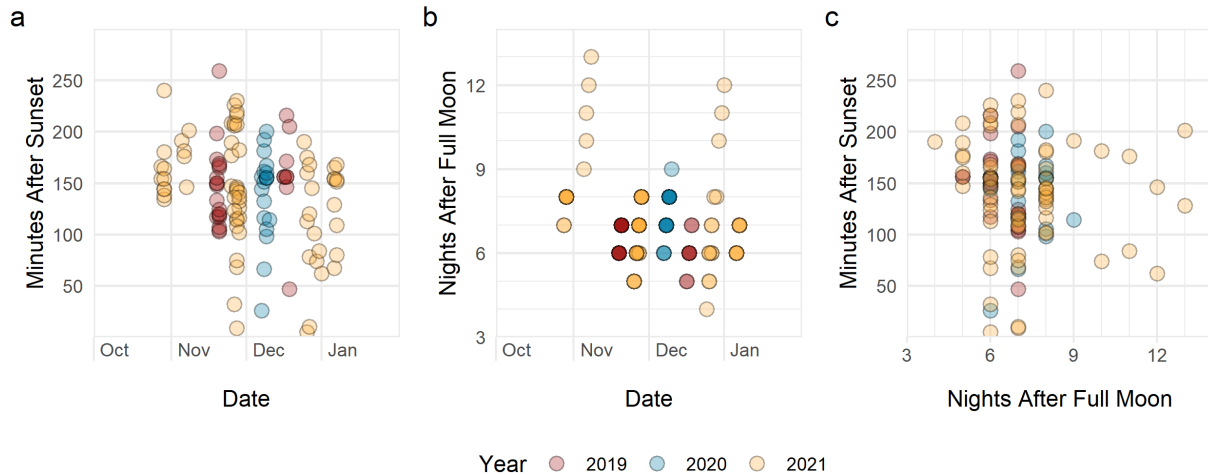

387 **Fig. 6** *Galaxea fascicularis ex situ* spawning periodicity over three spawning cycles (2019 –  
388 **2021**). **a** Spawning time, recorded as the first gamete release in Minutes After Sunset (MAS) by  
389 date. **b** Night After Full Moon (NAFM) of gamete release by date. **c** Comparison of MAS and  
390 NAFM values over three *ex situ* spawning cycles. 2019 n = 28, 2020 n = 19, 2021 n = 69.

## 391 Discussion

392 Here, we explored the potential of *G. fascicularis* as a novel coral model for symbiosis research  
393 by assessing its amenability to aquarium rearing, experimental handling, and symbiosis  
394 manipulation.

## 395 Successful bleaching with menthol

396 We showed that *G. fascicularis* can be readily and reliably rendered aposymbiotic through menthol  
397 bleaching, similar to other cnidarian model systems (e.g., Matthews et al. 2015; Röthig et al. 2021).

398 We lowered the menthol concentration in the protocol developed by Wang et al. (2012) to further  
399 limit stress on the host, and indeed all coral polyps survived this bleaching procedure on two  
400 independently replicated occasions. Overall, menthol treatment was very effective, with only a  
401 few algal cells remaining at the base of the tentacles. From a photophysiological perspective, these

402 scant remnants can be considered negligible, as illustrated by the light and dark oxygen production  
403 data. Furthermore, bleached polyps remained aposymbiotic for weeks and we therefore considered  
404 this bleaching protocol suitable for experimental investigation of aposymbiotic *G. fascicularis* in  
405 physiological studies and symbiosis manipulation.

406 Notably, besides Symbiodiniaceae, reef-building corals also associate with other microorganisms  
407 (i.e., bacteria, viruses, and other unicellular algae and protists) which constitute the so-called coral  
408 holobiont (Rosenberg et al. 2007). Although this has only been appreciated more recently,  
409 holobiont composition and dynamics are now understood to underlie coral health and adaptability  
410 (Pogoreutz et al. 2020). As menthol has photo-inhibitory (Wang et al. 2012; Clowez et al. 2021)  
411 and antimicrobial properties (İşcan et al. 2002), further studies should investigate the effects of  
412 menthol bleaching on the remaining members of the microbiome.

#### 413 **Tractability of symbiotic and aposymbiotic *G. fascicularis***

414 Tractability, as amenability to experimental work and laboratory conditions, is one of the most  
415 important requirements for model organisms. The *G. fascicularis* polyps and fragments could be  
416 maintained for three and ten weeks respectively in simple systems consisting of small independent  
417 tanks (5-6 L) with regular feeding and basic water quality care. These time frames match the  
418 requirements for most experimental designs, and we believe could be further extended. Indeed,  
419 symbiotic individuals looked healthy and responsive throughout the whole period, testifying to a  
420 comparatively hardy coral with only low demands on rearing conditions. Additionally, the positive  
421 net photosynthetic rate across a large temperature range confirmed the broad thermal tolerance of  
422 this species (Al-Horani 2005; McIlroy et al. 2019), which was retained in the simplified single  
423 polyp application.

424 Moreover, bleached polyps could be maintained in the simple experimental system for three weeks  
425 even with the additional stress of the thermal experiment. However, they eventually showed signs  
426 of deteriorating condition indicating that not all nutritional needs were met. Thus one priority is to  
427 develop bespoke feed for long-term rearing of bleached corals (Wang et al. 2012).

#### 428 **Thermal performance of symbiotic and aposymbiotic *G. fascicularis***

429 Studies that compare symbiotic and aposymbiotic coral holobionts are particularly informative for  
430 understanding coral response to climate change, and therefore we investigated the comparability  
431 between symbiotic and aposymbiotic *G. fascicularis* polyps. As expected, these differed in their  
432 photosynthetic rates, where the latter were net oxygen consumers even under illumination. Overall,  
433 symbiotic polyps had higher respiration rates than aposymbiotic polyps, which could be ascribed  
434 to the additional metabolic burden of the associated Symbiodiniaceae, as well as a greater  
435 metabolic capacity derived from the availability of photosynthates (Muscatine et al. 1981; Al-  
436 Horani et al. 2003). For all polyps, respiration rates overall increased with temperature in line with  
437 optimum thermal performance of corals and macroalgae from the central Red Sea (27-33 °C)  
438 (Anton et al. 2020).

439 Interestingly, we observed intraspecific variability in physiological performance. One colony  
440 (RS2) had significantly higher respiration rates than the others (Fig. S4). This manifested  
441 exclusively under dark conditions and was therefore more likely linked to host rather than  
442 symbiont identity. This variability warrants further investigations to better characterize host  
443 genotypes, as in the long term it will be necessary to establish representative host clonal lines.

#### 444 **Symbiosis reestablishment in adult corals**

445 We showed that adult bleached *G. fascicularis* can successfully reestablished symbiosis with  
446 cultured Symbiodiniaceae. The experimental repopulation of adult corals with cultured non-native



447 symbionts has only recently been demonstrated (Scharfenstein et al. 2022), and it is considered  
448 particularly relevant in the context of symbiosis manipulations to enhance heat tolerance in reef-  
449 building corals (van Oppen et al. 2015). Notably, here this was further explored with two non-  
450 native algal cultures during simultaneous exposure. The first, *D. trenchii* (ITS2 type D1-4), has  
451 never been found in *G. fascicularis* from Hong Kong (Huang et al. 2011; Tong et al. 2017) nor in  
452 our characterization of Symbiodiniaceae from that site specifically (two other colonies from the  
453 same location, Tab. S3) and can therefore confidently be considered to be non-native. The second,  
454 *C. goreau* (ITS2 type C1), was isolated from the coral species *A. tenuis* from Australia. Even  
455 though the dominant C1 ITS2-sequence is also present in *G. fascicularis* from Hong Kong, the  
456 high coral host-Symbiodiniaceae specificity, large radiation of C1-like Symbiodiniaceae  
457 (LaJeunesse 2005; Thornhill et al. 2014), and the consistent occurrence of the minor sequence C1c  
458 in addition to C1 in our samples, implicate the *C. goreau* culture as non-native in *G. fascicularis*.  
459 However, the higher similarity with the native symbionts likely explains the more efficient  
460 establishment of the *C. goreau* culture than the *D. trenchii* culture despite a reversed (10:90) ratio  
461 in supply.

462 *Galaxea fascicularis* has generally been reported to host taxa from the genera *Cladocopium* and  
463 *Durusdinium*, both exclusively and simultaneously, and with an equatorial-ward shift from  
464 *Cladocopium* dominance to *Durusdinium* dominance (Huang et al. 2011, and references therein).  
465 At Hong Kong's latitude and at our rearing temperature, *G. fascicularis* is expected to be  
466 exclusively associated with *Cladocopium* (Huang et al. 2011; Tong et al. 2017; Zhou et al. 2017),  
467 yet the targeted inoculation produced mixed-genus associations. This demonstrated how targeted  
468 inoculation can successfully shift Symbiodiniaceae community composition towards a higher  
469 proportion of heat tolerant strains without thermal treatment (Silverstein et al. 2015). Although the

470 longevity of these partnerships is still unclear, these are promising results for future development  
471 of *in hospite* studies on the role of temperature on inter-partner symbiosis dynamics and symbiont  
472 recognition mechanisms (Bove et al. 2022). The success and potential insights from such  
473 experimental approaches will rely on future efforts to establish a variety of coral host-specific  
474 Symbiodiniaceae cultures (including the establishment of specific cultures from *G. fascicularis*)  
475 for further study.

476 Of note, repopulation is possible even with lower concentrations of Symbiodiniaceae, as we  
477 observed from earlier qualitative trials (details in Supplementary Text). There, we exposed the  
478 menthol bleached polyps after they were used in the thermal performance experiment to  
479 Symbiodiniaceae through the water medium (symbionts shed by nearby symbiotic colonies) or  
480 additionally in combination with a one-time inoculum of freshly isolated symbionts from  
481 symbiotic conspecifics. The success rates of these qualitative trials of ~30 % and 43 %,  
482 respectively, were lower than in the Hong Kong experiment (100 %) yet remarkable considering  
483 the poorer health conditions of the polyps at the time of re-exposure to symbionts (i.e., after  
484 repeated incubations through the 21-32 °C temperature excursion), and the expectedly smaller  
485 number of symbionts available for uptake. In these trials, bleached hosts retained the ability to  
486 feed, which is known to facilitate symbiont uptake (Fitt and Trench 1983) and likely contributed  
487 to symbiosis re-establishment. In the long-term, the polyps that reestablished symbiosis grew into  
488 small colonies and became visually indistinguishable from the untreated controls (Fig. S5). Taken  
489 together, these observations attest to the suitability of *G. fascicularis* to experimental symbiosis  
490 manipulation.

## 491 ***Ex situ* spawning**

492 *Galaxea fascicularis* is a good model species candidate for sexual reproductive work due its high  
493 survivorship in aquarium conditions. As demonstrated herein, a combination of seasonal  
494 programming and husbandry enabled the species to complete a full gametogenic cycle *ex situ* over  
495 multiple years, which closely mimics that observed in the wild (Babcock et al. 1986; Baird et al.  
496 2021). Furthermore, we showed *in vitro* fertilization, embryological development, and *ex situ*  
497 larval settlement resulting in spat of known ages. As the age at which the species reaches sexual  
498 maturity is currently unknown, future studies should focus on this aspect, which is also important  
499 for producing an F2 generation and for closing the species life cycle *ex situ* (Craggs et al. 2020).  
500 Access to a F2 generation of known parental lineage will provide a platform to conduct  
501 experiments in areas such as mapping quantitative trait loci (Zhang 2012) or phenotypic traits such  
502 as growth, disease resistance, or thermal tolerance (van Oppen et al. 2015). As *Galaxea* must  
503 acquire their symbionts from the seawater (horizontal transmission, with symbionts visible after  
504 the development of tentacles in settled polyps, Lin et al. (2022)), *ex situ* spawning also opens  
505 possibilities for studies on the dynamics of initial symbiosis establishment and how this is affected  
506 by symbiont identity, heritability in symbiont selection, and for rearing of axenic or gnotobiotic  
507 coral lineages, paralleling procedures established for *Hydra* (Fraune et al. 2015).

## 508 **Conclusions**

509 The study of coral-algal symbiosis has been constrained by the difficulties of maintaining corals  
510 *ex situ* and of manipulating the coral-algal association to unravel symbiosis functioning. Here, we  
511 showed that adopting *G. fascicularis* as a model system can alleviate these limitations. Its  
512 demonstrated compatibility to rearing in simplified systems and experimental applications,  
513 together with the repeated spawning in aquaria, confirm the high tractability of this coral species.

514 Further, the possibility to readily obtain aposymbiotic individuals suitable for detailed study and  
515 symbiosis re-establishment set the stage for exciting future developments in coral symbiosis  
516 research which is necessary to understand corals' potential to cope with changing oceans.  
517 Besides these strengths, our study also highlights areas worth future efforts on the path to  
518 developing the *G. fascicularis* model system further. These include: i) better characterization of  
519 the effect of menthol on the rest of the coral microbiome (e.g., bacteria); ii) development of custom  
520 feed for long-term maintenance of bleached individuals; iii) assessment of long-term persistence  
521 of non-native Symbiodiniaceae, and testing of a variety of symbiont strains to understand the  
522 breadth of symbiont diversity that can be accommodated by the *G. fascicularis* host; iv) further  
523 characterization of host colonies and genotypes with the aim of establishing clonal lines, and from  
524 these, isolate and establish Symbiodiniaceae cultures, mirroring for example the development of  
525 the Aiptasia model; and v) development of collaborative platforms and open-access community  
526 resources around this emerging model system to accelerate research and discovery.

## 527 **Acknowledgements**

528 We thank Dr. Jafargholi Imani and Dr. Kathrin Ehlers (both JLU) for access and guidance in the  
529 fluorescence microscope facilities, André Dietzmann and Catarina P. P. Martins (both JLU) for  
530 assistance during experiments, and the Li Ka Shing Faculty of Medicine Core Facility (HKU) for  
531 the flow cytometry equipment.

532 This study is part of the 'Ocean2100' global change simulation project of the Colombian-German  
533 Center of Excellence in Marine Sciences (CEMarin) funded by the German Academic Exchange  
534 Service. We acknowledge financial support by the German Research Foundation (DFG, Project:  
535 469364832) to MZ and Hong Kong Research Grants Council #17117221 to SEM and #17108620  
536 to DMB.

537 **Data and code availability**

538 Data and R scripts used for this study are available at:

539 [https://github.com/sPuntinG/Galaxea\\_Coral\\_Model/](https://github.com/sPuntinG/Galaxea_Coral_Model/)

540 **Author contributions**

541 GP and MZ conceived and designed the study. GP, JC, RH, KEE, SM produced and analyzed data.

542 MS, DMB, MZ contributed reagents/materials/analysis tools. GP and MZ wrote the first draft with  
543 contributions from all authors.

544 **Conflict of Interest**

545 The authors declare no conflict of interest for this submission.

## 546 **References**

- 547 Al-Horani FA (2005) Effects of changing seawater temperature on photosynthesis and  
548 calcification in the scleractinian coral *Galaxea fascicularis*, measured with O<sub>2</sub>, Ca<sup>2+</sup> and pH  
549 microsensors. *Sci Mar* 69:347–354  
550 <http://scientiamarina.revistas.csic.es/index.php/scientiamarina/article/view/263/261>
- 551 Al-Horani FA, Al-Moghrabi SM, de Beer D (2003) The mechanism of calcification and its  
552 relation to photosynthesis and respiration in the scleractinian coral *Galaxea fascicularis*.  
553 *Mar Biol* 142:419–426 <http://link.springer.com/10.1007/s00227-002-0981-8>
- 554 Anton A, Randle JL, Garcia FC, Rossbach S, Ellis JI, Weinzierl M, Duarte CM (2020)  
555 Differential thermal tolerance between algae and corals may trigger the proliferation of  
556 algae in coral reefs. *Glob Chang Biol* 26:4316–4327  
557 <https://onlinelibrary.wiley.com/doi/10.1111/gcb.15141>
- 558 Babcock RC, Bull GD, Harrison PL, Heyward AJ, Oliver JK, Wallace CC, Willis BL (1986)  
559 Synchronous spawnings of 105 scleractinian coral species on the Great Barrier Reef. *Mar*  
560 *Biol* 90:379–394 <http://link.springer.com/10.1007/BF00428562>
- 561 Baird AH, Guest JR, Edwards AJ, Bauman AG, Bouwmeester J, Mera H, Abrego D, Alvarez-  
562 Noriega M, Babcock RC, Barbosa MB, Bonito V, Burt J, Cabaitan PC, Chang C-F,  
563 Chavanich S, Chen CA, Chen C-J, Chen W-J, Chung F-C, Connolly SR, Cumbo VR,  
564 Dornelas M, Doropoulos C, Eyal G, Eyal-Shaham L, Fadli N, Figueiredo J, Flot J-F, Gan S-  
565 H, Gomez E, Graham EM, Grinblat M, Gutiérrez-Isaza N, Harii S, Harrison PL, Hatta M,  
566 Ho NAJ, Hoarau G, Hoogenboom M, Howells EJ, Iguchi A, Isomura N, Jamodiong EA,  
567 Jandang S, Keyse J, Kitanobo S, Kongjandtre N, Kuo C-Y, Ligson C, Lin C-H, Low J, Loya  
568 Y, Maboloc EA, Madin JS, Mezaki T, Min C, Morita M, Moya A, Neo S-H, Nitschke MR,  
569 Nojima S, Nozawa Y, Piromvaragorn S, Plathong S, Puill-Stephan E, Quigley K, Ramirez-  
570 Portilla C, Ricardo G, Sakai K, Sampayo E, Shlesinger T, Sikim L, Simpson C, Sims CA,  
571 Sinniger F, Spiji DA, Tabalanza T, Tan C-H, Terraneo TI, Torda G, True J, Tun K,  
572 Vicentuan K, Viyakarn V, Waheed Z, Ward S, Willis B, Woods RM, Woolsey ES,  
573 Yamamoto HH, Yusuf S (2021) An Indo-Pacific coral spawning database. *Sci Data* 8:35  
574 <http://www.nature.com/articles/s41597-020-00793-8>

- 575 Bove CB, Ingersoll MV, Davies SW (2022) Help Me, Symbionts, You're My Only Hope:  
576 Approaches to Accelerate our Understanding of Coral Holobiont Interactions. *Integr Comp*  
577 *Biol* <https://academic.oup.com/icb/advance-article/doi/10.1093/icb/icac141/6696962>
- 578 Cignoni P, Callieri M, Corsini M, Dellepiane M, Ganovelli F, Ranzuglia G (2008) MeshLab: an  
579 Open-Source Mesh Processing Tool.
- 580 Clowez S, Renicke C, Pringle JR, Grossman AR (2021) Impact of menthol on growth and  
581 photosynthetic function of *Breviolum minutum* (Dinoflagellata, Dinophyceae,  
582 Symbiodiniaceae) and interactions with its *Aiptasia* host. *J Phycol* 57:245–257  
583 <https://onlinelibrary.wiley.com/doi/10.1111/jpy.13081>
- 584 Craggs J, Guest J, Brett A, Davis M, Sweet M (2018) Maintaining natural spawning timing in  
585 *Acropora* corals following long distance inter-continental transportation. *J Zoo Aquarium*  
586 *Res* 6:30–36
- 587 Craggs J, Guest JR, Bulling M, Sweet M (2019) Ex situ co culturing of the sea urchin, *Mespilia*  
588 *globulus* and the coral *Acropora millepora* enhances early post-settlement survivorship. *Sci*  
589 *Rep* 9:12984 <http://www.nature.com/articles/s41598-019-49447-9>
- 590 Craggs J, Guest JR, Davis M, Simmons J, Dashti E, Sweet M (2017) Inducing broadcast coral  
591 spawning ex situ: closed system mesocosm design and husbandry protocol. *Ecol Evol*  
592 7:11066 <https://onlinelibrary.wiley.com/doi/10.1002/ece3.3538>
- 593 Craggs J, Guest JR, Davis M, Sweet M (2020) Completing the life cycle of a broadcast spawning  
594 coral in a closed mesocosm. *Invertebr Reprod Dev* 64:244–247  
595 <https://www.tandfonline.com/doi/full/10.1080/07924259.2020.1759704>
- 596 Dimond J, Carrington E (2007) Temporal variation in the symbiosis and growth of the temperate  
597 scleractinian coral *Astrangia poculata*. *Mar Ecol Prog Ser* 348:161–172 [http://www.int-](http://www.int-res.com/abstracts/meps/v348/p161-172/)  
598 [res.com/abstracts/meps/v348/p161-172/](http://www.int-res.com/abstracts/meps/v348/p161-172/)
- 599 Dong Z-J, Huang H, Huang L-M, Li Y-C (2009) Diversity of symbiotic algae of the genus  
600 *Symbiodinium* in scleractinian corals of the Xisha Islands in the South China Sea. *J Syst*  
601 *Evol* 47:321–326 <https://onlinelibrary.wiley.com/doi/10.1111/j.1759-6831.2009.00034.x>
- 602 Falkowski PG, Dubinsky Z, Muscatine L, Porter JW (1984) Light and the bioenergetics of a

- 603 symbiotic coral. *Bioscience* 34:705–709 [https://academic.oup.com/bioscience/article-](https://academic.oup.com/bioscience/article-lookup/doi/10.2307/1309663)  
604 [lookup/doi/10.2307/1309663](https://academic.oup.com/bioscience/article-lookup/doi/10.2307/1309663)
- 605 Fitt WK, Trench RK (1983) Endocytosis of the symbiotic dinoflagellate *Symbiodinium*  
606 *microadriaticum* Freudenthal by endodermal cells of the scyphistomae of *Cassiopeia*  
607 *xamachana* and resistance of the algae to host digestion. *J Cell Sci* 64:195–212
- 608 Fraune S, Anton-Erxleben F, Augustin R, Franzenburg S, Knop M, Schröder K, Willoweit-Ohl  
609 D, Bosch TCG (2015) Bacteria–bacteria interactions within the microbiota of the ancestral  
610 metazoan *Hydra* contribute to fungal resistance. *ISME J* 9:1543–1556  
611 <http://www.nature.com/articles/ismej2014239>
- 612 Galliot B (2012) *Hydra*, a fruitful model system for 270 years. *Int J Dev Biol* 56:411–423  
613 <http://www.intjdevbiol.com/paper.php?doi=120086bg>
- 614 Gates RD, Baghdasarian G, Muscatine L (1992) Temperature stress causes host cell detachment  
615 in symbiotic cnidarians: implications for coral bleaching. *Biol Bull* 182:324–332  
616 <https://www.journals.uchicago.edu/doi/10.2307/1542252>
- 617 Gattuso J-P, Allemand D, Frankignoulle M (1999) Photosynthesis and Calcification at Cellular,  
618 Organismal and Community Levels in Coral Reefs: A Review on Interactions and Control  
619 by Carbonate Chemistry. *Am Zool* 39:160–183 [https://academic.oup.com/icb/article-](https://academic.oup.com/icb/article-lookup/doi/10.1093/icb/39.1.160)  
620 [lookup/doi/10.1093/icb/39.1.160](https://academic.oup.com/icb/article-lookup/doi/10.1093/icb/39.1.160)
- 621 Glynn PW, D’Croz L (1990) Experimental evidence for high temperature stress as the cause of  
622 El Niño-coincident coral mortality. *Coral Reefs* 8:181–191
- 623 Guillard RRL (1975) Culture of Phytoplankton for Feeding Marine Invertebrates. In: Smith,  
624 W.L., Chanley M.H. (eds) *Culture of Marine Invertebrate Animals*. Springer US, Boston,  
625 MA, pp 29–60 [http://link.springer.com/10.1007/978-1-4615-8714-9\\_3](http://link.springer.com/10.1007/978-1-4615-8714-9_3)
- 626 Harrison PL (1988) Pseudo-gynodioecy: an unusual breeding system in the scleractinian coral  
627 *Galaxea fascicularis*. 699–  
628 705 [https://researchportal.scu.edu.au/esploro/outputs/conferencePaper/Pseudo-gynodioecy-](https://researchportal.scu.edu.au/esploro/outputs/conferencePaper/Pseudo-gynodioecy-an-unusual-breeding-system-in-the-scleractinian-coral-Galaxea-fascicularia/991012821519702368)  
629 [an-unusual-breeding-system-in-the-scleractinian-coral-Galaxea-](https://researchportal.scu.edu.au/esploro/outputs/conferencePaper/Pseudo-gynodioecy-an-unusual-breeding-system-in-the-scleractinian-coral-Galaxea-fascicularia/991012821519702368)  
630 [fascicularia/991012821519702368](https://researchportal.scu.edu.au/esploro/outputs/conferencePaper/Pseudo-gynodioecy-an-unusual-breeding-system-in-the-scleractinian-coral-Galaxea-fascicularia/991012821519702368)



- 631 Hoegh-Guldberg O (1999) Climate change, coral bleaching and the future of the world's coral  
632 reefs. *Mar Freshw Res* 50:839–866 <http://www.publish.csiro.au/?paper=MF99078>
- 633 van Hooijdonk R, Maynard J, Tamelander J, Gove J, Ahmadi G, Raymundo L, Williams G,  
634 Heron SF, Planes S (2016) Local-scale projections of coral reef futures and implications of  
635 the Paris Agreement. *Sci Rep* 6:39666 <http://www.nature.com/articles/srep39666>
- 636 Huang H, Dong Z, Huang L, Yang J, Di B, Li Y, Zhou G, Zhang C (2011) Latitudinal variation  
637 in algal symbionts within the scleractinian coral *Galaxea fascicularis* in the South China  
638 Sea. *Mar Biol Res* 7:208–211  
639 <http://www.tandfonline.com/doi/abs/10.1080/17451000.2010.489616>
- 640 Hume BCC, Smith EG, Ziegler M, Warrington HJM, Burt JA, LaJeunesse TC, Wiedenmann J,  
641 Voolstra CR (2019) SymPortal: A novel analytical framework and platform for coral algal  
642 symbiont next-generation sequencing ITS2 profiling. *Mol Ecol Resour* 19:1063–1080
- 643 Hume BCC, Ziegler M, Poulain J, Pochon X, Romac S, Boissin E, de Vargas C, Planes S,  
644 Wincker P, Voolstra CR (2018) An improved primer set and amplification protocol with  
645 increased specificity and sensitivity targeting the *Symbiodinium* ITS2 region. *PeerJ* 6:e4816  
646 <https://peerj.com/articles/4816>
- 647 İşcan G, Kirimer N, Kürkcüoğlu M, Hüsnü Can Başer, Demirci F (2002) Antimicrobial  
648 screening of *Mentha piperita* essential oils. *J Agric Food Chem* 50:3943–3946  
649 <https://doi.org/10.1021/jf011476k>
- 650 Keshavmurthy S, Hsu CM, Kuo CY, Denis V, Leung JKL, Fontana S, Hsieh HJ, Tsai W Sen, Su  
651 WC, Chen CA (2012) Larval development of fertilized “pseudo-gynodioecious” eggs  
652 suggests a sexual pattern of gynodioecy in *Galaxea fascicularis* (Scleractinia: Euphyllidae).  
653 *Zool Stud* 51:143–149
- 654 Kuznetsova A, Brockhoff PB, Christensen RHB (2017) lmerTest Package: Tests in Linear Mixed  
655 Effects Models. *J Stat Softw* 82:1–26  
656 <https://www.jstatsoft.org/index.php/jss/article/view/v082i13>
- 657 LaJeunesse TC (2005) “Species” Radiations of Symbiotic Dinoflagellates in the Atlantic and  
658 Indo-Pacific Since the Miocene-Pliocene Transition. *Mol Biol Evol* 22:570–581

- 659 <https://academic.oup.com/mbe/article-lookup/doi/10.1093/molbev/msi042>
- 660 Liew YJ, Aranda M, Voolstra CR (2016) Reefgenomics.Org - a repository for marine genomics  
661 data. Database 2016:baw152 [https://academic.oup.com/database/article-](https://academic.oup.com/database/article-lookup/doi/10.1093/database/baw152)  
662 [lookup/doi/10.1093/database/baw152](https://academic.oup.com/database/article-lookup/doi/10.1093/database/baw152)
- 663 Lin C, Kang C-M, Huang C-Y, Li H-H, Tsai S (2022) Study on the Development and Growth of  
664 Coral Larvae. Appl Sci 12:5255 <https://www.mdpi.com/2076-3417/12/10/5255>
- 665 Lüdecke D, Ben-Shachar M, Patil I, Waggoner P, Makowski D (2021) performance: An R  
666 Package for Assessment, Comparison and Testing of Statistical Models. J Open Source  
667 Softw 6:3139 <https://joss.theoj.org/papers/10.21105/joss.03139>
- 668 Marshall AT, Clode P (2004) Calcification rate and the effect of temperature in a zooxanthellate  
669 and an azooxanthellate scleractinian reef coral. Coral Reefs 23:218–224  
670 <http://link.springer.com/10.1007/s00338-004-0369-y>
- 671 Marshall PA, Baird AH (2000) Bleaching of corals on the Great Barrier Reef: differential  
672 susceptibilities among taxa. Coral Reefs 19:155–163  
673 <http://link.springer.com/10.1007/s003380000086>
- 674 Matthews JL, Sproles AE, Oakley CA, Grossman AR, Weis VM, Davy SK (2015) Menthol-  
675 induced bleaching rapidly and effectively provides experimental aposymbiotic sea  
676 anemones (*Aiptasia* sp.) for symbiosis investigations. J Exp Biol 219:306–310  
677 <http://jeb.biologists.org/cgi/doi/10.1242/jeb.128934>
- 678 McIlroy SE, Thompson PD, Yuan FL, Bonebrake TC, Baker DM (2019) Subtropical thermal  
679 variation supports persistence of corals but limits productivity of coral reefs. Proc R Soc B  
680 Biol Sci 286:20190882 <https://royalsocietypublishing.org/doi/10.1098/rspb.2019.0882>
- 681 McIlroy SE, Wong JCY, Baker DM (2020) Competitive traits of coral symbionts may alter the  
682 structure and function of the microbiome. ISME J 14:2424–2432  
683 <https://www.nature.com/articles/s41396-020-0697-0>
- 684 McLachlan RH, Price JT, Solomon SL, Grottoli AG (2020) Thirty years of coral heat-stress  
685 experiments: a review of methods. Coral Reefs 39:885–902  
686 <https://link.springer.com/10.1007/s00338-020-01931-9>

- 687 Muscatine L, R. McCloskey L, E. Marian R (1981) Estimating the daily contribution of carbon  
688 from zooxanthellae to coral animal respiration. *Limnol Oceanogr* 26:601–611  
689 <http://doi.wiley.com/10.4319/lo.1981.26.4.0601>
- 690 Niu W, Huang H, Lin R, Chen C-H, Shen K-N, Hsiao C-D (2016) The complete mitogenome of  
691 the Galaxy Coral, *Galaxea fascicularis* (Cnidaria: Oculinidae). *Mitochondrial DNA Part B*  
692 1:10–11 <https://www.tandfonline.com/doi/full/10.1080/23802359.2015.1137796>
- 693 van Oppen MJH, Oliver JK, Putnam HM, Gates RD (2015) Building coral reef resilience  
694 through assisted evolution. *Proc Natl Acad Sci* 112:2307–2313  
695 <http://www.pnas.org/lookup/doi/10.1073/pnas.1422301112>
- 696 Pavia RTB, Estacion JS (2019) Survival and growth of isolated polyps of *Galaxea fascicularis*  
697 (Linnaeus 1767) on six kinds of culture substrates: implications for mariculture, aquarium  
698 culture, and conservation. *J World Aquac Soc* 50:219–230  
699 <https://onlinelibrary.wiley.com/doi/10.1111/jwas.12538>
- 700 Pogoreutz C, Voolstra CR, Rädercker N, Weis V (2020) The coral holobiont highlights the  
701 dependence of cnidarian animal hosts on their associated microbes. *Cellular dialogues in the*  
702 *holobiont*. pp 91–118
- 703 Puntin G, Sweet M, Fraune S, Medina M, Sharp K, Weis VM, Ziegler M (2022) Harnessing the  
704 Power of Model Organisms To Unravel Microbial Functions in the Coral Holobiont.  
705 *Microbiol Mol Biol Rev* <https://journals.asm.org/doi/10.1128/mmbr.00053-22>
- 706 R Core Team (2021) R: A Language and Environment for Statistical Computing. [https://www.r-](https://www.r-project.org/)  
707 [project.org/ https://www.r-project.org/](https://www.r-project.org/)
- 708 Rades M, Schubert P, Ziegler M, Kröckel M, Reichert J (2022) Building plan for a temperature-  
709 controlled multi-point stirring incubator. [https://www.protocols.io/view/building-plan-for-a-](https://www.protocols.io/view/building-plan-for-a-temperature-controlled-multi-p-dm6gpb34dlzp/v1)  
710 [temperature-controlled-multi-p-dm6gpb34dlzp/v1 https://www.protocols.io/view/building-](https://www.protocols.io/view/building-plan-for-a-temperature-controlled-multi-p-dm6gpb34dlzp/v1)  
711 [plan-for-a-temperature-controlled-multi-p-dm6gpb34dlzp/v1](https://www.protocols.io/view/building-plan-for-a-temperature-controlled-multi-p-dm6gpb34dlzp/v1)
- 712 Rosenberg E, Koren O, Reshef L, Efrony R, Zilber-Rosenberg I (2007) The role of  
713 microorganisms in coral health, disease and evolution. *Nat Rev Microbiol* 5:355–362
- 714 Röthig T, Puntin G, Wong JCY, Burian A, McLeod W, Baker DM (2021) Holobiont nitrogen

- 715 control and its potential for eutrophication resistance in an obligate photosymbiotic  
716 jellyfish. *Microbiome* 9:127  
717 <https://microbiomejournal.biomedcentral.com/articles/10.1186/s40168-021-01075-0>
- 718 Scharfenstein HJ, Chan WY, Buerger P, Humphrey C, van Oppen MJH (2022) Evidence for de  
719 novo acquisition of microalgal symbionts by bleached adult corals. *ISME J* 16:1676–1679  
720 <https://www.nature.com/articles/s41396-022-01203-0>
- 721 Schneider K, Erez J (2006) The effect of carbonate chemistry on calcification and photosynthesis  
722 in the hermatypic coral *Acropora eurystoma*. *Limnol Oceanogr* 51:1284–1293  
723 <https://doi.org/10.4319/lo.2006.51.3.1284>
- 724 Schubert P, Wilke T (2018) Coral Microcosms: Challenges and Opportunities for Global Change  
725 Biology. *Corals in a Changing World*. InTech, pp 143–175  
726 [http://www.intechopen.com/books/corals-in-a-changing-world/coral-microcosms-](http://www.intechopen.com/books/corals-in-a-changing-world/coral-microcosms-challenges-and-opportunities-for-global-change-biology)  
727 [challenges-and-opportunities-for-global-change-biology](http://www.intechopen.com/books/corals-in-a-changing-world/coral-microcosms-challenges-and-opportunities-for-global-change-biology)
- 728 Searle SR, Speed FM, Milliken GA (1980) Population Marginal Means in the Linear Model: An  
729 Alternative to Least Squares Means. *Am Stat* 34:216–221  
730 <http://www.tandfonline.com/doi/abs/10.1080/00031305.1980.10483031>
- 731 Silverstein RN, Cunning R, Baker AC (2015) Change in algal symbiont communities after  
732 bleaching, not prior heat exposure, increases heat tolerance of reef corals. *Glob Chang Biol*  
733 21:236–249 <https://onlinelibrary.wiley.com/doi/10.1111/gcb.12706>
- 734 Thornhill DJ, Lewis AM, Wham DC, LaJeunesse TC (2014) HOST-SPECIALIST LINEAGES  
735 DOMINATE THE ADAPTIVE RADIATION OF REEF CORAL ENDOSYMBIONTS.  
736 *Evolution* (N Y) 68:352–367 <https://onlinelibrary.wiley.com/doi/10.1111/evo.12270>
- 737 Tong H, Cai L, Zhou G, Yuan T, Zhang W, Tian R, Huang H, Qian P-Y (2017) Temperature  
738 shapes coral-algal symbiosis in the South China Sea. *Sci Rep* 7:1–12  
739 <http://dx.doi.org/10.1038/srep40118>
- 740 Veron JEN, Stafford-Smith MG, Turak E, DeVantier LM (2016) *Corals of the World*.  
741 [http://www.coralsoftheworld.org/species\\_factsheets/species\\_factsheet\\_distribution/galaxea-](http://www.coralsoftheworld.org/species_factsheets/species_factsheet_distribution/galaxea-fascicularis/?version=0.01)  
742 [fascicularis/?version=0.01](http://www.coralsoftheworld.org/species_factsheets/species_factsheet_distribution/galaxea-fascicularis/?version=0.01)

- 743 [http://www.coralsoftheworld.org/species\\_factsheets/species\\_factsheet\\_distribution/galaxea-](http://www.coralsoftheworld.org/species_factsheets/species_factsheet_distribution/galaxea-fascicularis/?version=0.01)  
744 [fascicularis/?version=0.01](http://www.coralsoftheworld.org/species_factsheets/species_factsheet_distribution/galaxea-fascicularis/?version=0.01)
- 745 Woolstra CR (2013) A journey into the wild of the cnidarian model system *Aiptasia* and its  
746 symbionts. *Mol Ecol* 22:4366–4368
- 747 Wang J-T, Chen Y-Y, Tew KS, Meng P-J, Chen CA (2012) Physiological and biochemical  
748 performances of menthol-induced aposymbiotic corals. *PLoS One* 7:e46406  
749 <https://dx.plos.org/10.1371/journal.pone.0046406>
- 750 Weis VM, Davy SK, Hoegh-Guldberg O, Rodriguez-Lanetty M, Pringle JR (2008) Cell biology  
751 in model systems as the key to understanding corals. *Trends Ecol Evol* 23:369–376  
752 <https://linkinghub.elsevier.com/retrieve/pii/S0169534708001614>
- 753 Wepfer P, Nakajima Y, Hui F, Mitarai S, Economo E (2020a) Metacommunity ecology of  
754 Symbiodiniaceae hosted by the coral *Galaxea fascicularis*. *Mar Ecol Prog Ser* 633:71–87  
755 <https://www.int-res.com/abstracts/meps/v633/p71-87/>
- 756 Wepfer PH, Nakajima Y, Sutthacheep M, Radice VZ, Richards Z, Ang P, Terraneo T, Sudek M,  
757 Fujimura A, Toonen RJ, Mikheyev AS, Economo EP, Mitarai S (2020b) Evolutionary  
758 biogeography of the reef-building coral genus *Galaxea* across the Indo-Pacific ocean. *Mol*  
759 *Phylogenet Evol* 151:106905 <https://doi.org/10.1016/j.ympev.2020.106905>
- 760 Wickham H (2016) *Ggplot2: Elegant graphics for data analysis*. Springer International  
761 Publishing, Cham, Switzerland <https://books.google.de/books?id=RTMFswEACAAJ>
- 762 Zhang Y (2012) *Quantitative Trait Loci (QTL)*. Humana Press, Totowa, NJ  
763 <http://link.springer.com/10.1007/978-1-61779-785-9>
- 764 Zhou G, Cai L, Li Y, Tong H, Jiang L, Zhang Y, Lei X, Guo M, Liu S, Qian P-Y, Huang H  
765 (2017) Temperature-driven local acclimatization of *Symbiodinium* hosted by the coral  
766 *Galaxea fascicularis* at Hainan Island, China. *Front Microbiol* 8:1–9  
767 <http://journal.frontiersin.org/article/10.3389/fmicb.2017.02487/full>
- 768 Ziegler M, Arif C, Burt JA, Dobretsov S, Roder C, LaJeunesse TC, Woolstra CR (2017)  
769 Biogeography and molecular diversity of coral symbionts in the genus *Symbiodinium*  
770 around the Arabian Peninsula. *J Biogeogr* 44:674–686

771 <https://onlinelibrary.wiley.com/doi/10.1111/jbi.12913>

772 Ziegler M, Roder C, Büchel C, Voolstra C (2015) Niche acclimatization in Red Sea corals is

773 dependent on flexibility of host-symbiont association. *Mar Ecol Prog Ser* 533:149–161

774 <http://www.int-res.com/abstracts/meps/v533/p149-161/>

775
